# Supplementary material for: Missense variants in hMLH1 identified in patients from the German HNPCC consortium and functional studies
Source: Springer Nature journal article supplement (doi:10.1007/s10689-011-9431-4), 2011-03-14
Supplement: MOESM1 [file 10689_2011_9431_MOESM1_ESM.xls]

## Sheet: table
Table S1. Data from families of the German HNPCC consortium Table contains: all mutations, families, tumor type, age of onset, MSI status, IHC, in silico protein values, our own functional data on a subset of missense variants, as well as available literature data for all missense mutations
clinical	FID	PID	tested	in combination with pathogenic mutation in gene	in combination with missense variant in MLH1	ICD-10	tumor	age of diagnosis	MSI	IHC_MLH1	IHC_PMS2	description			results described in this report					in silico			literature results
												Gene	HGVS	protein	% interaction with PMS2 in Yeast	% DNE of wild type	protein expression in yeast cells	expression in human cells % of wt	experimental RNA analysis	SIFT	PolyPhen	MAPP-MMR	MMR +	MMR -	DNE + (wild type)	DNE -	interaction with PMS2 (yeast) +	interaction with PMS2 (yeast) -	interaction with PMS2 (human) +	interaction with PMS2 (human) -
Bethesda	1	1-1	yes			D12.6	Adenoma	unknown				MLH1	c.52C>T	p.R18C								23.4
Bethesda	1	1-2	no			C16	Malignant neoplasm of stomach	34,5				MLH1	c.52C>T	p.R18C
Bethesda	1	1-2	no			C18.9	Malignant neoplasm of colon, unspecified	34,5				MLH1	c.52C>T	p.R18C
Bethesda	1	1-3	no			C50	Malignant neoplasm of breast	unknown				MLH1	c.52C>T	p.R18C
Amsterdam-II		2-1	yes (negative)			C18.0	Malignant neoplasm of caecum	40,4	MSI-H	>10%/positive		MLH1	c.62C>A	p.A21E	70	19	like wt	92		0	2.322	37.3
Amsterdam-II	2	2-2	no			C18.9	Malignant neoplasm of colon, unspecified	62,5				MLH1	c.62C>A	p.A21E
Amsterdam-II	2	2-3	yes (positive)			C18.0	Malignant neoplasm of caecum	50,7	MSI-H	>1-10%	>10%/positive	MLH1	c.62C>A	p.A21E
Amsterdam-II	2	2-4	no			C18.9	Malignant neoplasm of colon, unspecified	76,5				MLH1	c.62C>A	p.A21E
Amsterdam-II	2	2-5	no			C91.9	Lymphoid leukaemia, unspecified	unknown				MLH1	c.62C>A	p.A21E
Amsterdam-II	3	3-1	no			C18.9	Malignant neoplasm of colon, unspecified	63,5				MLH1	c.62C>A	p.A21E
Amsterdam-II	3	3-1	no			C18.9	Malignant neoplasm of colon, unspecified	36,5				MLH1	c.62C>A	p.A21E
Amsterdam-II	3	3-2	yes (positive)			C18.2	Malignant neoplasm of ascending colon	40,5	MSI-H			MLH1	c.62C>A	p.A21E
Amsterdam-II	3	3-3	yes (positive)			C18.2	Malignant neoplasm of ascending colon	39,6	MSI-H	>10%/positive	>10%/positive	MLH1	c.62C>A	p.A21E
Bethesda	4	4-1	yes (positive)		p.V213M	C18.4	Malignant neoplasm of transverse colon	35,6	MSI-H			MLH1	c.80G>C	p.R27P								20.94
Bethesda	4	4-2	no			C50	Malignant neoplasm of breast	44,5				MLH1	c.80G>C	p.R27P
Bethesda	4	4-3	no			C71	Malignant neoplasm of brain	unknown				MLH1	c.80G>C	p.R27P
Bethesda	4	4-4	no			C57.9	Malignant neoplasm of female genital organ, unspecified	59,5				MLH1	c.80G>C	p.R27P
Bethesda	4	4-5	no			C53	Malignant neoplasm of cervix uteri	35,5				MLH1	c.80G>C	p.R27P
Bethesda	4	4-6	no			C15	Malignant neoplasms of digestive organs	76,5				MLH1	c.80G>C	p.R27P
Bethesda	4	4-6	no			C53	Malignant neoplasm of cervix uteri	42,9				MLH1	c.80G>C	p.R27P
Bethesda	5	5-1	yes (positive)			C18.4	Malignant neoplasm of transverse colon	30,2	MSI-H	0%		MLH1	c.83C>T	p.P28L	7	4	reduced	5		0	3.379	5.9		[18 22]	[22]			[6]	[18]
Bethesda	5	5-2	no			C18.2	Malignant neoplasm of ascending colon	43,5				MLH1	c.83C>T	p.P28L
Bethesda	6	6-1	yes (positive)			C18.2	Malignant neoplasm of ascending colon	27	MSI-H	>10%/positive		MLH1	c.83C>T	p.P28L
Bethesda	6	6-2	no			C54.1	Malignant neoplasm of endometrium	30,5				MLH1	c.83C>T	p.P28L
Bethesda	7	7-1	yes (positive)			C18.2	Malignant neoplasm of ascending colon	38	MSI-H	>0-1%	>0-1%	MLH1	c.83C>T	p.P28L
Bethesda	7	7-2	no			C18.9	Malignant neoplasm of colon, unspecified	unknown				MLH1	c.83C>T	p.P28L
Bethesda	8	8-1	yes (positive)			C18.0	Malignant neoplasm of caecum	52,3	MSI-H	>0-1%		MLH1	c.83C>T	p.P28L
Bethesda	8	8-1	yes (positive)			C18.4	Malignant neoplasm of transverse colon	56,8				MLH1	c.83C>T	p.P28L
Bethesda	8	8-1	yes (positive)			C18.6	Malignant neoplasm of descending colon	44,6				MLH1	c.83C>T	p.P28L
Bethesda	8	8-2	no			C18.9	Malignant neoplasm of colon, unspecified	unknown				MLH1	c.83C>T	p.P28L
Bethesda	8	8-3	no			C18.9	Malignant neoplasm of colon, unspecified	< 85				MLH1	c.83C>T	p.P28L
Bethesda	9	9-1	yes (positive)			C20	Malignant neoplasm of rectum	35,5	MSS	>10%/positive	>10%/positive	MLH1	c.91_92delGCinsTG	p.A31C								3,26 bord
Bethesda	9	9-2	no			C32	Malignant neoplasm of larynx	40,5				MLH1	c.91_92delGCinsTG	p.A31C
Bethesda	10	10-1	yes (positive)		p.G454R	D12.6	Adenoma	unknown				MLH1	c.91_92delGCinsTG	p.A31C								3,26 bord
Bethesda	10	10-2	yes (positive)		p.G454R		none	unknown				MLH1	c.91_92delGCinsTG	p.A31C
Bethesda	10	10-3	no				Carcinoma	unknown				MLH1	c.91_92delGCinsTG	p.A31C
Bethesda	10	10-3	no			C18.9	Malignant neoplasm of colon, unspecified	39,5				MLH1	c.91_92delGCinsTG	p.A31C
Bethesda	10	10-4	no			C54.1	Malignant neoplasm of endometrium	42,5				MLH1	c.91_92delGCinsTG	p.A31C
Bethesda	11	11-1	yes (positive)	MLH1		C18.2	Malignant neoplasm of ascending colon	45	MSI-H			MLH1	c.112A>G	p.N38D								29.27		[22]	[22]
Bethesda	11	11-2	no			C54	Malignant neoplasm of corpus uteri	60,5				MLH1	c.112A>G	p.N38D
Bethesda	11	11-3	no			C18.2	Malignant neoplasm of ascending colon	54,8				MLH1	c.112A>G	p.N38D
Bethesda	11	11-4	no			C55	Malignant neoplasm of uterus, part unspecified	73,5				MLH1	c.112A>G	p.N38D
Amsterdam-II	12	12-1	yes (positive)			C18.7	Malignant neoplasm of sigmoid colon	49,9	MSS	>10%/positive		MLH1	c.116G>A	p.C39Y								14.69
Amsterdam-II	12	12-2	no			C18.9	Malignant neoplasm of colon, unspecified	70,5				MLH1	c.116G>A	p.C39Y
Amsterdam-II	12	12-3	no			C18.9	Malignant neoplasm of colon, unspecified	54,5				MLH1	c.116G>A	p.C39Y
Amsterdam-II	13	13-1	yes (positive)			C18.2	Malignant neoplasm of ascending colon	35,9	MSI-H	>10%/positive	>10%/positive	MLH1	c.122A>G	p.D41G								20.85
Amsterdam-II	13	13-2	no			C18.9	Malignant neoplasm of colon, unspecified	44,1				MLH1	c.122A>G	p.D41G
Amsterdam-II	13	13-3	no			C18.9	Malignant neoplasm of colon, unspecified	unknown				MLH1	c.122A>G	p.D41G
Bethesda	14	14-1	yes (positive)			C18.2	Malignant neoplasm of ascending colon	39,6	MSI-H	>0-1%		MLH1	c.143A>C	p.Q48P	3	0	reduced	16		0.19	1.969	5.9
Bethesda	14	14-2	no			C18.9	Malignant neoplasm of colon, unspecified	54,5				MLH1	c.143A>C	p.Q48P
Bethesda	14	14-3	no			C16	Malignant neoplasm of stomach	unknown				MLH1	c.143A>C	p.Q48P
Bethesda	14	14-4	no			C16	Malignant neoplasm of stomach	unknown				MLH1	c.143A>C	p.Q48P
Bethesda	15	15-1	yes (positive)			C19	Malignant neoplasm of rectosigmoid junction	44,5	MSI-H	>1-10%		MLH1	c.189C>A	p.D63E								23.98	[18]
Bethesda	15	15-1	yes (positive)			C54.1	Malignant neoplasm of endometrium	50,4				MLH1	c.189C>A	p.D63E
Bethesda	15	15-2	yes (positive)			C56	Malignant neoplasm of ovary	41,8	MSI-H	0%		MLH1	c.189C>A	p.D63E
Bethesda	15	15-3	yes (positive)			C18.6	Malignant neoplasm of descending colon	37,8	MSI-H	>1-10%		MLH1	c.189C>A	p.D63E
Bethesda	15	15-4	no			C25.9	Malignant neoplasm of pancreas, unspecified	79,5				MLH1	c.189C>A	p.D63E
Bethesda	15	15-5	no			C80	Malignant neoplasms of ill-defined, secondary and unspecified sites	52,5				MLH1	c.189C>A	p.D63E
Bethesda	15	15-6	no			C16.9	Malignant neoplasm of malignant neoplasm of stomach, unspecified	unknown				MLH1	c.189C>A	p.D63E
Amsterdam-II	16	16-1	yes (positive)		p.H329P	C17.0	Malignant neoplasm of duodenum	47,4				MLH1	c.191A>G	p.N64S	53	1,2	reduced	13		0	1.96	11.5		[22]	[22]
Amsterdam-II	16	16-1	yes (positive)			C18.0	Malignant neoplasm of caecum	47,4	MSI-H	0%		MLH1	c.191A>G	p.N64S
Amsterdam-II	16	16-1	yes (positive)			C18.2	Malignant neoplasm of ascending colon	47,4				MLH1	c.191A>G	p.N64S
Amsterdam-II	16	16-2	no			C16.0	Malignant neoplasm of cardia	43,5				MLH1	c.191A>G	p.N64S
Amsterdam-II	16	16-2	no			C18.9	Malignant neoplasm of colon, unspecified	43,5				MLH1	c.191A>G	p.N64S
Amsterdam-II	16	16-3	yes (positive)				none	unknown				MLH1	c.191A>G	p.N64S
Amsterdam-II	16	16-4	no			C18.9	Malignant neoplasm of colon, unspecified	68,5				MLH1	c.191A>G	p.N64S
Amsterdam-II	16	16-5	no			C34	Malignant neoplasm of bronchus and lung	>= 75				MLH1	c.191A>G	p.N64S
Amsterdam-II	16	16-6	no			C18.9	Malignant neoplasm of colon, unspecified	unknown				MLH1	c.191A>G	p.N64S
Bethesda	17	17-1	yes (positive)			C18.2	Malignant neoplasm of ascending colon	36,2	MSI-H			MLH1	c.199G>A	p.G67R								36.52		[18, 22]		[16, 22]		[6]	[18]
Bethesda	18	18-1	yes (positive)			C18.9	Malignant neoplasm of colon, unspecified	35,5	MSI-H	>0-1%		MLH1	c.199G>A	p.G67R
Bethesda	19	19-1	yes (positive)			C18.2	Malignant neoplasm of ascending colon	30	MSI-H	>10%/positive		MLH1	c.199G>A	p.G67R
Bethesda	19	19-2	no			C18.9	Malignant neoplasm of colon, unspecified	43,5				MLH1	c.199G>A	p.G67R
Bethesda	19	19-3	no			C18.9	Malignant neoplasm of colon, unspecified	unknown				MLH1	c.199G>A	p.G67R
Bethesda	20	20-1	yes (positive)			C18.2	Malignant neoplasm of ascending colon	45,1	MSI-H	0%	0%	MLH1	c.199G>A	p.G67R
Bethesda	20	20-2	no			C15	Malignant neoplasms of digestive organs	72,5				MLH1	c.199G>A	p.G67R
Bethesda	20	20-3	no			C18.9	Malignant neoplasm of colon, unspecified	50,5				MLH1	c.199G>A	p.G67R
Bethesda	21	21-1	yes (positive)			C17.2	Malignant neoplasm of ileum	31,2	MSI-H			MLH1	c.199G>A	p.G67R
Bethesda	21	21-2	no			C18.3	Malignant neoplasm of hepatic flexure	42,5				MLH1	c.199G>A	p.G67R
Bethesda	21	21-2	no			C18.3	Malignant neoplasm of hepatic flexure	41,8				MLH1	c.199G>A	p.G67R
Bethesda	22	22-1	yes (positive)			C18.2	Malignant neoplasm of ascending colon	37,7	MSI-H	0%		MLH1	c.199G>A	p.G67R
Bethesda	22	22-2	no			C18.9	Malignant neoplasm of colon, unspecified	50,5				MLH1	c.199G>A	p.G67R
Bethesda	22	22-3	no			C57.9	Malignant neoplasm of female genital organ, unspecified	22,5				MLH1	c.199G>A	p.G67R
Amsterdam-II	23	23-1	yes (positive)	MLH1		C18.0	Malignant neoplasm of caecum	44,8				MLH1	c.199G>A	p.G67R
Amsterdam-II	23	23-1	yes (positive)	MLH1		C18.2	Malignant neoplasm of ascending colon	60,5	MSI-H			MLH1	c.199G>A	p.G67R
Amsterdam-II	23	23-2	no			C18.9	Malignant neoplasm of colon, unspecified	61,5				MLH1	c.199G>A	p.G67R
Amsterdam-II	23	23-3	no			C54.1	Malignant neoplasm of endometrium	unknown				MLH1	c.199G>A	p.G67R
Amsterdam-II	23	23-4	no			C18.1	Malignant neoplasm of appendix	31,5				MLH1	c.199G>A	p.G67R
Bethesda	24	24-1	yes (positive)			C18.2	Malignant neoplasm of ascending colon	32,2				MLH1	c.230G>A	p.C77Y					normal splicing [40]			6.58		[22]	[22]	[16]		[6]
Bethesda	24	24-1	yes (positive)			C18.4	Malignant neoplasm of transverse colon	37,1				MLH1	c.230G>A	p.C77Y
Bethesda	24	24-1	yes (positive)			C18.6	Malignant neoplasm of descending colon	37,1				MLH1	c.230G>A	p.C77Y
Bethesda	24	24-2	no			C16	Malignant neoplasm of stomach	51,5				MLH1	c.230G>A	p.C77Y
Bethesda	24	24-3	no			C18.9	Malignant neoplasm of colon, unspecified	52,5				MLH1	c.230G>A	p.C77Y
Bethesda	24	24-4	no			C18.9	Malignant neoplasm of colon, unspecified	69,5				MLH1	c.230G>A	p.C77Y
Bethesda	24	24-5	yes (positive)			C18.7	Malignant neoplasm of sigmoid colon	51,5				MLH1	c.230G>A	p.C77Y
Bethesda	24	24-6	no			C18.9	Malignant neoplasm of colon, unspecified	50,5				MLH1	c.230G>A	p.C77Y
Amsterdam-II	25	25-1	no			C18.2	Malignant neoplasm of ascending colon	52,8				MLH1	c.230G>A	p.C77Y
Amsterdam-II	25	25-1	no			C18.9	Malignant neoplasm of colon, unspecified	37,1				MLH1	c.230G>A	p.C77Y
Amsterdam-II	25	25-2	no			C18.3	Malignant neoplasm of hepatic flexure	27,9				MLH1	c.230G>A	p.C77Y
Amsterdam-II	25	25-2	no			C18.5	Malignant neoplasm of splenic flexure	27,9				MLH1	c.230G>A	p.C77Y
Amsterdam-II	25	25-3	no			C18.9	Malignant neoplasm of colon, unspecified	27,5				MLH1	c.230G>A	p.C77Y
Bethesda	26	26-1	yes (positive)			C18.2	Malignant neoplasm of ascending colon	43,6	MSI-H	0%	0%	MLH1	c.230G>A	p.C77Y
Amsterdam-II	27	27-1	no			C18.9	Malignant neoplasm of colon, unspecified	57,5				MLH1	c.230G>A	p.C77Y
Amsterdam-II	27	27-2	no			C16	Malignant neoplasm of stomach	51,5				MLH1	c.230G>A	p.C77Y
Amsterdam-II	27	27-2	no			C18.9	Malignant neoplasm of colon, unspecified	51,5				MLH1	c.230G>A	p.C77Y
Amsterdam-II	27	27-3	no			C18.9	Malignant neoplasm of colon, unspecified	50,5				MLH1	c.230G>A	p.C77Y
Amsterdam-II	27	27-4	yes (positive)			C18.2	Malignant neoplasm of ascending colon	51,2	MSI-H	>1-10%		MLH1	c.230G>A	p.C77Y
Amsterdam-II	27	27-5	no			C18.9	Malignant neoplasm of colon, unspecified	36,5				MLH1	c.230G>A	p.C77Y
Amsterdam-II	27	27-5	no			C18.9	Malignant neoplasm of colon, unspecified	34,5				MLH1	c.230G>A	p.C77Y
Bethesda	28	28-1	yes (positive)				Carcinoma	51				MLH1	c.238T>G	p.F80V	275	6	increased	96		0.01	2.944	4.5		[18, 22]	[22]				[18]
Bethesda	28	28-2	no			C18.9	Malignant neoplasm of colon, unspecified	52,5				MLH1	c.238T>G	p.F80V
Bethesda	28	28-3	no			C16.9	Malignant neoplasm of malignant neoplasm of stomach, unspecified	85,5				MLH1	c.238T>G	p.F80V
Bethesda	28	28-4	no			C18.9	Malignant neoplasm of colon, unspecified	70,5				MLH1	c.238T>G	p.F80V
Bethesda	28	28-5	no			C80	Malignant neoplasms of ill-defined, secondary and unspecified sites	85,5				MLH1	c.238T>G	p.F80V
Bethesda	28	28-6	no			C80	Malignant neoplasms of ill-defined, secondary and unspecified sites	55,5				MLH1	c.238T>G	p.F80V
Bethesda	28	28-7	yes (positive)			D12.6	Adenoma	unknown				MLH1	c.238T>G	p.F80V
Bethesda	29	29-1	yes (positive)			C18.2	Malignant neoplasm of ascending colon	< 46,4				MLH1	c.238T>G	p.F80V
Bethesda	29	29-2	yes (positive)			C18.2	Malignant neoplasm of ascending colon	63,3	MSI-H	>10%/positive		MLH1	c.238T>G	p.F80V
Bethesda	30	30-1	yes (positive)			C18.7	Malignant neoplasm of sigmoid colon	35,1	MSI-H	0%		MLH1	c.244A>G	p.T82A								36.7
Bethesda	30	30-2	no			C18.9	Malignant neoplasm of colon, unspecified	unknown				MLH1	c.244A>G	p.T82A
Bethesda	31	31-1	yes (positive)			C18.2	Malignant neoplasm of ascending colon	32,1	MSI-H			MLH1	c.250A>G	p.K84E	99	36	like wt	22		0	2.207	23.17		[18, 22]	[22]				[18]
Bethesda	31	31-2	no			C17.0	Malignant neoplasm of duodenum	< 41				MLH1	c.250A>G	p.K84E
Bethesda	31	31-3	no			C50	Malignant neoplasm of breast	unknown				MLH1	c.250A>G	p.K84E
Bethesda	31	31-4	no			C50	Malignant neoplasm of breast	unknown				MLH1	c.250A>G	p.K84E
Bethesda	32	32-1	yes (positive)		p.V716M	C18.4	Malignant neoplasm of transverse colon	41,9		0%	0%	MLH1	c.283T>G	p.S95A								3.07
Bethesda	32	32-2	no			C50	Malignant neoplasm of breast	< 51				MLH1	c.283T>G	p.S95A
Bethesda	32	32-3	no			C16	Malignant neoplasm of stomach	59 <= x < 82,4				MLH1	c.283T>G	p.S95A
Bethesda	32	32-4	no			C50	Malignant neoplasm of breast	26,5				MLH1	c.283T>G	p.S95A
Bethesda	32	32-4	no			C56	Malignant neoplasm of ovary	33 <= x < 51,4				MLH1	c.283T>G	p.S95A
Bethesda	33	33-1	yes (positive)			C18.3	Malignant neoplasm of hepatic flexure	37,7	MSI-H	>10%/positive		MLH1	c.289T>G	p.Y97D								10.5
Bethesda	33	33-2	no			C80	Malignant neoplasms of ill-defined, secondary and unspecified sites	41,5				MLH1	c.289T>G	p.Y97D
Bethesda	33	33-3	no			C18.9	Malignant neoplasm of colon, unspecified	35,5				MLH1	c.289T>G	p.Y97D
Bethesda	33	33-4	no			C18.9	Malignant neoplasm of colon, unspecified	43,5				MLH1	c.289T>G	p.Y97D
Bethesda	33	33-5	no			C50.9	Malignant neoplasm of breast, unspecified	45,5				MLH1	c.289T>G	p.Y97D
Amsterdam-II	34	34-1	yes (positive)			C56	Malignant neoplasm of ovary	42,6	MSI-H	>10%/positive	0%	MLH1	c.301G>C	p.G101R								36.7
Amsterdam-II	34	34-2	no			C18.9	Malignant neoplasm of colon, unspecified	51,5				MLH1	c.301G>C	p.G101R
Amsterdam-II	34	34-2	no			C62	Malignant neoplasm of testis	46,5				MLH1	c.301G>C	p.G101R
Amsterdam-II	34	34-3	no			C18.9	Malignant neoplasm of colon, unspecified	45,5				MLH1	c.301G>C	p.G101R
Amsterdam-II	34	34-3	no			C61	Malignant neoplasm of prostate	< 53				MLH1	c.301G>C	p.G101R
Amsterdam-II	34	34-4	no			C62	Malignant neoplasm of testis	44,5				MLH1	c.301G>C	p.G101R
Amsterdam-II	34	34-5	no			C18.9	Malignant neoplasm of colon, unspecified	60,5				MLH1	c.301G>C	p.G101R
Amsterdam-II	34	34-6	no			C18.9	Malignant neoplasm of colon, unspecified	73,5				MLH1	c.301G>C	p.G101R
Amsterdam-II	34	34-7	no			C18.9	Malignant neoplasm of colon, unspecified	51,5				MLH1	c.301G>C	p.G101R
Amsterdam-II	34	34-8	no			C18.9	Malignant neoplasm of colon, unspecified	45,5				MLH1	c.301G>C	p.G101R
Amsterdam-II	34	34-9	no			C20	Malignant neoplasm of rectum	64,5				MLH1	c.301G>C	p.G101R
Amsterdam-II	34	34-10	no			C18.9	Malignant neoplasm of colon, unspecified	unknown				MLH1	c.301G>C	p.G101R
Bethesda	35	35-1	yes (positive)			C18.2	Malignant neoplasm of ascending colon	39,4	MSI-H	>10%/positive	>10%/positive	MLH1	c.302G>T	p.G101V	14	31	like wt	7		0	2.964	29.2
Bethesda	35	35-2	no			C18.9	Malignant neoplasm of colon, unspecified	70,5				MLH1	c.302G>T	p.G101V
Bethesda	35	35-2	no			C18.9	Malignant neoplasm of colon, unspecified	53,5				MLH1	c.302G>T	p.G101V
Bethesda	35	35-2	no			C18.9	Malignant neoplasm of colon, unspecified	38,5				MLH1	c.302G>T	p.G101V
Bethesda	35	35-3	no			C22	Malignant neoplasm of liver and intrahepatic bile ducts	unknown				MLH1	c.302G>T	p.G101V
Bethesda	35	35-4	no			C34	Malignant neoplasm of bronchus and lung	unknown				MLH1	c.302G>T	p.G101V
Bethesda	36	36-1	yes (positive)			C50.9	Malignant neoplasm of breast, unspecified	41,2	MSS	>10%/positive	>10%/positive	MLH1	c.338T>G	p.V113G								8.98
Bethesda	36	36-1	yes (positive)			C54.1	Malignant neoplasm of endometrium	38,1	MSI-H	0%	0%	MLH1	c.338T>G	p.V113G
Bethesda	36	36-2	no			C18.9	Malignant neoplasm of colon, unspecified	86,5				MLH1	c.338T>G	p.V113G
Amsterdam-II	37	37-1	no			C18.3	Malignant neoplasm of hepatic flexure	39,3				MLH1	c.350C>T	p.T117M								21.05		[17, 22]		[16, 22]		[6]
Amsterdam-II	37	37-1	no			C18.7	Malignant neoplasm of sigmoid colon	38,8	MSI-H	0%	0%	MLH1	c.350C>T	p.T117M
Amsterdam-II	37	37-2	yes (positive)	MLH1		C18.3	Malignant neoplasm of hepatic flexure	32,9				MLH1	c.350C>T	p.T117M
Amsterdam-II	37	37-2	yes (positive)	MLH1		C54.1	Malignant neoplasm of endometrium	62,1				MLH1	c.350C>T	p.T117M
Amsterdam-II	37	37-3	no			C18.9	Malignant neoplasm of colon, unspecified	unknown				MLH1	c.350C>T	p.T117M
Bethesda	38	38-1	yes (positive)			C18.0	Malignant neoplasm of caecum	38,8	MSI-H	0%		MLH1	c.350C>T	p.T117M
Bethesda	38	38-1	yes (positive)			C64	Malignant neoplasm of urinary tract	38,1				MLH1	c.350C>T	p.T117M
Bethesda	38	38-2	no			C18.9	Malignant neoplasm of colon, unspecified	80,5				MLH1	c.350C>T	p.T117M
Bethesda	39	39-1	yes (positive)			C18.2	Malignant neoplasm of ascending colon	52,2				MLH1	c.350C>G	p.T117R								32.5		[22]		[16, 22]		[6]
Bethesda	39	39-1	yes (positive)			C18.6	Malignant neoplasm of descending colon	64	MSI-H	>0-1%		MLH1	c.350C>G	p.T117R
Bethesda	39	39-1	yes (positive)			C18.6	Malignant neoplasm of descending colon	64				MLH1	c.350C>G	p.T117R
Bethesda	39	39-1	yes (positive)			C50	Malignant neoplasm of breast	60,1				MLH1	c.350C>G	p.T117R
Bethesda	39	39-1	yes (positive)			C56	Malignant neoplasm of ovary	52,2				MLH1	c.350C>G	p.T117R
Bethesda	39	39-2	no			C18.9	Malignant neoplasm of colon, unspecified	56,5				MLH1	c.350C>G	p.T117R
Bethesda	39	39-3	no			C64	Malignant neoplasm of urinary tract	68,5				MLH1	c.350C>G	p.T117R
Bethesda	39	39-4	no			C18.9	Malignant neoplasm of colon, unspecified	32,5				MLH1	c.350C>G	p.T117R
Bethesda	39	39-5	no			C18.9	Malignant neoplasm of colon, unspecified	75,5				MLH1	c.350C>G	p.T117R
Bethesda	39	39-6	no			C18.9	Malignant neoplasm of colon, unspecified	55,5				MLH1	c.350C>G	p.T117R
Bethesda	39	39-7	no			C18.9	Malignant neoplasm of colon, unspecified	76,5				MLH1	c.350C>G	p.T117R
Amsterdam-II	40	40-1	yes (positive)			C18.2	Malignant neoplasm of ascending colon	47,1		0%		MLH1	c.388T>C	p.Y130H								11.5
Amsterdam-II	40	40-2	no			C18.9	Malignant neoplasm of colon, unspecified	54,5				MLH1	c.388T>C	p.Y130H
Amsterdam-II	40	40-3	no			C55	Malignant neoplasm of uterus, part unspecified	unknown				MLH1	c.388T>C	p.Y130H
Amsterdam-II	40	40-4	no			C55	Malignant neoplasm of uterus, part unspecified	40,5				MLH1	c.388T>C	p.Y130H
Amsterdam-II	40	40-5	no			C16	Malignant neoplasm of stomach	45,5				MLH1	c.388T>C	p.Y130H
Amsterdam-II	40	40-5	no			C18.9	Malignant neoplasm of colon, unspecified	43,5				MLH1	c.388T>C	p.Y130H
Amsterdam-II	40	40-6	no			C18.9	Malignant neoplasm of colon, unspecified	unknown				MLH1	c.388T>C	p.Y130H
Amsterdam-II	40	40-7	no			C67	Malignant neoplasm of bladder	unknown				MLH1	c.388T>C	p.Y130H
Bethesda	41	41-1	yes (positive)			C18.2	Malignant neoplasm of ascending colon	59,6	MSI-H	0%		MLH1	c.439G>T	p.G147W								21.89
Bethesda	41	41-1	yes (positive)			C18.7	Malignant neoplasm of sigmoid colon	58,4	MSI-H	0%		MLH1	c.439G>T	p.G147W
Bethesda	41	41-2	no			C18.4	Malignant neoplasm of transverse colon	39,6	MSI-H	0%	0%	MLH1	c.439G>T	p.G147W
Bethesda	41	41-3	no			C50	Malignant neoplasm of breast	unknown				MLH1	c.439G>T	p.G147W
Bethesda	41	41-4	no			C15	Malignant neoplasms of digestive organs	40,5				MLH1	c.439G>T	p.G147W
Bethesda	41	41-5	no			C50	Malignant neoplasm of breast	< 69,2				MLH1	c.439G>T	p.G147W
Bethesda	41	41-6	no			C50	Malignant neoplasm of breast	65,5				MLH1	c.439G>T	p.G147W
Bethesda	41	41-6	no			C53	Malignant neoplasm of cervix uteri	66,5				MLH1	c.439G>T	p.G147W
Bethesda	42	42-1	yes (positive)			C18.4	Malignant neoplasm of transverse colon	39,7	MSI-H	0%	0%	MLH1	c.439G>T	p.G147W
Amsterdam-II	43	43-1	yes (positive)			C18.2	Malignant neoplasm of ascending colon	33,1	MSI-H	0%		MLH1	c.464T>G	p.L155R								35.2		[18]					[18]
Amsterdam-II	43	43-1	yes (positive)			C54.1	Malignant neoplasm of endometrium	45				MLH1	c.464T>G	p.L155R
Amsterdam-II	43	43-2	no			C18.6	Malignant neoplasm of descending colon	42,5	MSI-H	>0-1%	0%	MLH1	c.464T>G	p.L155R
Amsterdam-II	43	43-3	no			C18.9	Malignant neoplasm of colon, unspecified	< 55				MLH1	c.464T>G	p.L155R
Amsterdam-II	43	43-4	no			C18.9	Malignant neoplasm of colon, unspecified	48,9				MLH1	c.464T>G	p.L155R
Amsterdam-II	43	43-5	no			C18.9	Malignant neoplasm of colon, unspecified	< 53				MLH1	c.464T>G	p.L155R
Amsterdam-II	43	43-6	no			C18.9	Malignant neoplasm of colon, unspecified	40,5				MLH1	c.464T>G	p.L155R
Amsterdam-II	43	43-7	no			C18.9	Malignant neoplasm of colon, unspecified	unknown				MLH1	c.464T>G	p.L155R
Amsterdam-II	44	44-1	yes (positive)	MLH1		C18.5	Malignant neoplasm of splenic flexure	46,1	MSI-H	0%	0%	MLH1	c.544A>G	p.R182G					aberrant splicing [35]			7.19
Amsterdam-II	44	44-2	no			C18.9	Malignant neoplasm of colon, unspecified	47,5				MLH1	c.544A>G	p.R182G
Amsterdam-II	44	44-3	no			C18.9	Malignant neoplasm of colon, unspecified	45,5				MLH1	c.544A>G	p.R182G
Amsterdam-II	44	44-4	no			C18.9	Malignant neoplasm of colon, unspecified	unknown				MLH1	c.544A>G	p.R182G
Amsterdam-II	44	44-5	no			C40	Malignant neoplasm of bone and articular cartilage	14,5				MLH1	c.544A>G	p.R182G
Bethesda	4	4-1	yes (positive)		p.R27P	C18.4	Malignant neoplasm of transverse colon	35,6	MSI-H			MLH1	c.637G>A	p.V213M								1.99	[18, 22]		[22]		[6]		[18]
Bethesda	4	4-2	no			C50	Malignant neoplasm of breast	44,5				MLH1	c.637G>A	p.V213M
Bethesda	4	4-3	no			C71	Malignant neoplasm of brain	unknown				MLH1	c.637G>A	p.V213M
Bethesda	4	4-4	no			C57.9	Malignant neoplasm of female genital organ, unspecified	59,5				MLH1	c.637G>A	p.V213M
Bethesda	4	4-5	no			C53	Malignant neoplasm of cervix uteri	35,5				MLH1	c.637G>A	p.V213M
Bethesda	4	4-6	no			C15	Malignant neoplasms of digestive organs	76,5				MLH1	c.637G>A	p.V213M
Bethesda	4	4-6	no			C53	Malignant neoplasm of cervix uteri	42,9				MLH1	c.637G>A	p.V213M
Amsterdam-II	45	45-1	yes (positive)			C18.2	Malignant neoplasm of ascending colon	38	MSI-H	>0-1%	>0-1%	MLH1	c.647T>G	p.I216S								11.8
Amsterdam-II	45	45-2	no			C18.2	Malignant neoplasm of ascending colon	55,5				MLH1	c.647T>G	p.I216S
Amsterdam-II	45	45-3	no			C18.2	Malignant neoplasm of ascending colon	59,5				MLH1	c.647T>G	p.I216S
Amsterdam-II	45	45-3	no			C18.3	Malignant neoplasm of hepatic flexure	59,5				MLH1	c.647T>G	p.I216S
Amsterdam-II	45	45-4	no			C80	Malignant neoplasms of ill-defined, secondary and unspecified sites	unknown				MLH1	c.647T>G	p.I216S
Bethesda	46	46-1	yes (positive)			D12.6	Adenoma	unknown				MLH1	c.677G>T	p.R226L					aberrant splicing [36]			6.09
Bethesda	46	46-2	no			C18.9	Malignant neoplasm of colon, unspecified	36,5				MLH1	c.677G>T	p.R226L					aberrant splicing [36]
Bethesda	46	46-2	no			C18.9	Malignant neoplasm of colon, unspecified	35,5				MLH1	c.677G>T	p.R226L
Bethesda	46	46-3	no			C18.9	Malignant neoplasm of colon, unspecified	46,5				MLH1	c.677G>T	p.R226L
Bethesda	46	46-4	no			C18.9	Malignant neoplasm of colon, unspecified	38,5				MLH1	c.677G>T	p.R226L
Bethesda	47	47-1	yes (positive)		p.V716M	C18.2	Malignant neoplasm of ascending colon	42,7	MSI-H	>10%/positive		MLH1	c.681A>C	p.E227D								2.87
Bethesda	47	47-2	no			C18.2	Malignant neoplasm of ascending colon	67,5	MSS	>10%/positive		MLH1	c.681A>C	p.E227D
Bethesda	48	48-1	yes (positive)			C18.5	Malignant neoplasm of splenic flexure	36,5	MSI-H			MLH1	c.694G>A	p.G232R								4,1 bord
Amsterdam-II	49	49-1	yes (positive)			C18.4	Malignant neoplasm of transverse colon	59,2	MSI-H	0%		MLH1	c.739T>C	p.S247P								7.88		[18]					[18]
Amsterdam-II	49	49-1	yes (positive)			C20	Malignant neoplasm of rectum	56,1				MLH1	c.739T>C	p.S247P
Amsterdam-II	49	49-2	no			C18.9	Malignant neoplasm of colon, unspecified	< 78				MLH1	c.739T>C	p.S247P
Amsterdam-II	49	49-3	no			C80	Malignant neoplasms of ill-defined, secondary and unspecified sites	< 48				MLH1	c.739T>C	p.S247P
Amsterdam-II	49	49-4	no			C18.6	Malignant neoplasm of descending colon	42,2				MLH1	c.739T>C	p.S247P
Amsterdam-II	49	49-5	no			C55	Malignant neoplasm of uterus, part unspecified	< 53				MLH1	c.739T>C	p.S247P
Amsterdam-II	49	49-6	no			C18.9	Malignant neoplasm of colon, unspecified	< 79,6				MLH1	c.739T>C	p.S247P
Amsterdam-II	49	49-7	no			C55	Malignant neoplasm of uterus, part unspecified	unknown				MLH1	c.739T>C	p.S247P
Amsterdam-II	49	49-8	no			C16	Malignant neoplasm of stomach	< 55				MLH1	c.739T>C	p.S247P
Amsterdam-II	49	49-9	no			C18.9	Malignant neoplasm of colon, unspecified	< 43				MLH1	c.739T>C	p.S247P
Amsterdam-II	49	49-10	no			C64	Malignant neoplasm of urinary tract	49,5				MLH1	c.739T>C	p.S247P
Amsterdam-II	49	49-11	no			C80	Malignant neoplasms of ill-defined, secondary and unspecified sites	unknown				MLH1	c.739T>C	p.S247P
Amsterdam-II	49	49-12	no			C80	Malignant neoplasms of ill-defined, secondary and unspecified sites	unknown				MLH1	c.739T>C	p.S247P
Amsterdam-II	49	49-13	no			C80	Malignant neoplasms of ill-defined, secondary and unspecified sites	unknown				MLH1	c.739T>C	p.S247P
Amsterdam-II	49	49-14	no			C80	Malignant neoplasms of ill-defined, secondary and unspecified sites	unknown				MLH1	c.739T>C	p.S247P
Amsterdam-II	49	49-15	no			C80	Malignant neoplasms of ill-defined, secondary and unspecified sites	unknown				MLH1	c.739T>C	p.S247P
Amsterdam-II	50	50-1	yes (positive)			C18.2	Malignant neoplasm of ascending colon	43				MLH1	c.739T>C	p.S247P
Amsterdam-II	50	50-1	yes (positive)			C18.6	Malignant neoplasm of descending colon	65,6	MSI-H	>0-1%	0%	MLH1	c.739T>C	p.S247P
Amsterdam-II	50	50-1	yes (positive)			C18.9	Malignant neoplasm of colon, unspecified	43				MLH1	c.739T>C	p.S247P
Amsterdam-II	50	50-2	no			C18.9	Malignant neoplasm of colon, unspecified	unknown				MLH1	c.739T>C	p.S247P
Amsterdam-II	50	50-3	no			C16	Malignant neoplasm of stomach	unknown				MLH1	c.739T>C	p.S247P
Amsterdam-II	50	50-3	no			C18.9	Malignant neoplasm of colon, unspecified	45,5				MLH1	c.739T>C	p.S247P
Amsterdam-II	50	50-4	no			C16	Malignant neoplasm of stomach	unknown				MLH1	c.739T>C	p.S247P
Amsterdam-II	51	51-1	yes (positive)			C16	Malignant neoplasm of stomach	45,2		0%	0%	MLH1	c.739T>C	p.S247P
Amsterdam-II	51	51-1	yes (positive)			C18.2	Malignant neoplasm of ascending colon	41,2				MLH1	c.739T>C	p.S247P
Amsterdam-II	51	51-2	no			C18.9	Malignant neoplasm of colon, unspecified	49,5				MLH1	c.739T>C	p.S247P
Amsterdam-II	51	51-3	no			C16	Malignant neoplasm of stomach	unknown				MLH1	c.739T>C	p.S247P
Amsterdam-II	51	51-3	no			C18.9	Malignant neoplasm of colon, unspecified	49,5				MLH1	c.739T>C	p.S247P
Amsterdam-II	52	52-1	yes (positive)	MSH2		C18.4	Malignant neoplasm of transverse colon	41,4		>10%/positive	>10%/positive	MLH1	c.778C>T	p.L260F								12.78
Amsterdam-II	52	52-2	no			C18.9	Malignant neoplasm of colon, unspecified	34,5				MLH1	c.778C>T	p.L260F
Amsterdam-II	52	52-3	no			C18.9	Malignant neoplasm of colon, unspecified	45,5				MLH1	c.778C>T	p.L260F
Amsterdam-II	52	52-4	no			C18.9	Malignant neoplasm of colon, unspecified	55,5				MLH1	c.778C>T	p.L260F
Amsterdam-II	52	52-5	no			C18.9	Malignant neoplasm of colon, unspecified	45,5				MLH1	c.778C>T	p.L260F
Amsterdam-II	52	52-6	no			C55	Malignant neoplasm of uterus, part unspecified	49,5				MLH1	c.778C>T	p.L260F
Amsterdam-II	52	52-7	no			C16	Malignant neoplasm of stomach	58,5				MLH1	c.778C>T	p.L260F
Amsterdam-II	52	52-8	yes (positive)	MSH2		C18.9	Malignant neoplasm of colon, unspecified	35,6				MLH1	c.778C>T	p.L260F
Amsterdam-II	52	52-8	yes (positive)	MSH2		C61	Malignant neoplasm of prostate	68,1				MLH1	c.778C>T	p.L260F
Amsterdam-II	53	53-1	yes (positive)	MLH1		C18.2	Malignant neoplasm of ascending colon	55,8	MSI-H	0%		MLH1	c.793C>T	p.R265C								27.43	[17]	[22]	[22]
Amsterdam-II	53	53-2	no			C73	Malignant neoplasms of thyroid and other endocrine glands	69,5				MLH1	c.793C>T	p.R265C
Amsterdam-II	53	53-3	no			C18.9	Malignant neoplasm of colon, unspecified	42,5				MLH1	c.793C>T	p.R265C
Amsterdam-II	53	53-4	no			C16	Malignant neoplasm of stomach	71,5				MLH1	c.793C>T	p.R265C
Amsterdam-II	53	53-5	no			C18.9	Malignant neoplasm of colon, unspecified	50,5				MLH1	c.793C>T	p.R265C
Amsterdam-II	54	54-1	yes (positive)	MLH1		C18.3	Malignant neoplasm of hepatic flexure	38,4	MSI-H	0%		MLH1	c.793C>T	p.R265C
Amsterdam-II	54	54-2	no			C18.9	Malignant neoplasm of colon, unspecified	40,5				MLH1	c.793C>T	p.R265C
Amsterdam-II	54	54-3	no			C18.9	Malignant neoplasm of colon, unspecified	unknown				MLH1	c.793C>T	p.R265C
Bethesda	55	55-1	yes (positive)	MLH1		C18.0	Malignant neoplasm of caecum	30,6				MLH1	c.793C>T	p.R265C
Bethesda	55	55-1	yes (positive)	MLH1		C18.5	Malignant neoplasm of splenic flexure	39,4	MSI-H	>1-10%		MLH1	c.793C>T	p.R265C
Bethesda	55	55-2	no			C43	Melanoma and other malignant neoplasms of skin	65,5				MLH1	c.793C>T	p.R265C
Bethesda	55	55-3	no			C18.2	Malignant neoplasm of ascending colon	60,5				MLH1	c.793C>T	p.R265C
Bethesda	55	55-4	no			C61	Malignant neoplasm of prostate	54,5				MLH1	c.793C>T	p.R265C
Bethesda	55	55-5	no			C40	Malignant neoplasm of bone and articular cartilage	75,5				MLH1	c.793C>T	p.R265C
Bethesda	55	55-6	no			C18.9	Malignant neoplasm of colon, unspecified	60,5				MLH1	c.793C>T	p.R265C
Bethesda	56	56-1	yes (positive)	MLH1		C18.6	Malignant neoplasm of descending colon	36,5		0%	>10%/positive	MLH1	c.793C>T	p.R265C
Bethesda	56	56-2	no			C18.9	Malignant neoplasm of colon, unspecified	39,5				MLH1	c.793C>T	p.R265C
Bethesda	56	56-2	no			C67	Malignant neoplasm of bladder	41,5				MLH1	c.793C>T	p.R265C
Bethesda	56	56-3	no			C22	Malignant neoplasm of liver and intrahepatic bile ducts	69,5				MLH1	c.793C>T	p.R265C
Bethesda	56	56-4	no			C18.9	Malignant neoplasm of colon, unspecified	63,5				MLH1	c.793C>T	p.R265C
Amsterdam-II	57	57-1	yes (positive)			C18.2	Malignant neoplasm of ascending colon	36	MSI-H	>10%/positive	>10%/positive	MLH1	c.793C>T	p.R265C
Amsterdam-II	57	57-2	no			C18.9	Malignant neoplasm of colon, unspecified	25,5				MLH1	c.793C>T	p.R265C
Amsterdam-II	57	57-3	no			C18.2	Malignant neoplasm of ascending colon	62,6				MLH1	c.793C>T	p.R265C
Amsterdam-II	57	57-3	no			C18.4	Malignant neoplasm of transverse colon	62,6				MLH1	c.793C>T	p.R265C
Amsterdam-II	57	57-3	no			C18.5	Malignant neoplasm of splenic flexure	35,5				MLH1	c.793C>T	p.R265C
Amsterdam-II	57	57-4	no			C18.9	Malignant neoplasm of colon, unspecified	33,5				MLH1	c.793C>T	p.R265C
Amsterdam-II	57	57-5	no			C18.9	Malignant neoplasm of colon, unspecified	< 74				MLH1	c.793C>T	p.R265C
Bethesda	58	58-1	yes (positive)			C18.2	Malignant neoplasm of ascending colon	46,5				MLH1	c.793C>T	p.R265C
Bethesda	58	58-1	yes (positive)			C18.2	Malignant neoplasm of ascending colon	46,5	MSI-H	0%		MLH1	c.793C>T	p.R265C
Bethesda	58	58-1	yes (positive)			C18.4	Malignant neoplasm of transverse colon	33,7				MLH1	c.793C>T	p.R265C
Amsterdam-II	59	59-1	yes (positive)			C18.4	Malignant neoplasm of transverse colon	42,9	MSI-H	0%		MLH1	c.793C>T	p.R265C
Amsterdam-II	59	59-2	yes (positive)			C18.4	Malignant neoplasm of transverse colon	45,6				MLH1	c.793C>T	p.R265C
Amsterdam-II	59	59-3	no			C81	Hodgkin's disease	23,9				MLH1	c.793C>T	p.R265C
Amsterdam-II	59	59-4	no			C18.9	Malignant neoplasm of colon, unspecified	55,5				MLH1	c.793C>T	p.R265C
Amsterdam-II	59	59-5	no			C18.9	Malignant neoplasm of colon, unspecified	unknown				MLH1	c.793C>T	p.R265C
Amsterdam-II	59	59-5	no			C55	Malignant neoplasm of uterus, part unspecified	unknown				MLH1	c.793C>T	p.R265C
Amsterdam-II	59	59-6	no			C18.9	Malignant neoplasm of colon, unspecified	30,5				MLH1	c.793C>T	p.R265C
Amsterdam-II	60	60-1	yes (positive)			C18.2	Malignant neoplasm of ascending colon	46,9	MSI-H	0%		MLH1	c.793C>T	p.R265C
Amsterdam-II	60	60-2	no			C18.9	Malignant neoplasm of colon, unspecified	unknown				MLH1	c.793C>T	p.R265C
Amsterdam-II	60	60-3	no			C18.9	Malignant neoplasm of colon, unspecified	unknown				MLH1	c.793C>T	p.R265C
Bethesda	61	61-1	yes (positive)			C18.4	Malignant neoplasm of transverse colon	43,2	MSI-H	0%		MLH1	c.793C>T	p.R265C
Bethesda	61	61-2	no			C61	Malignant neoplasm of prostate	83,5				MLH1	c.793C>T	p.R265C
Bethesda	61	61-3	no			C16.9	Malignant neoplasm of malignant neoplasm of stomach, unspecified	31,5				MLH1	c.793C>T	p.R265C
Bethesda	61	61-4	no			C80	Malignant neoplasms of ill-defined, secondary and unspecified sites	60,5				MLH1	c.793C>T	p.R265C
Bethesda	61	61-5	no			C18.9	Malignant neoplasm of colon, unspecified	35,5				MLH1	c.793C>T	p.R265C
Bethesda	61	61-6	no			C18.9	Malignant neoplasm of colon, unspecified	32,5				MLH1	c.793C>T	p.R265C
Bethesda	61	61-7	no			C72.9	Malignant neoplasm of central nervous system, unspecified	37,5				MLH1	c.793C>T	p.R265C
Bethesda	62	62-1	yes (positive)			C18.6	Malignant neoplasm of descending colon	45,9	MSI-H			MLH1	c.793C>T	p.R265C
Bethesda	62	62-2	no			C34.9	Malignant neoplasm of bronchus or lung, unspecified	51,5				MLH1	c.793C>T	p.R265C
Bethesda	62	62-3	no			C18.9	Malignant neoplasm of colon, unspecified	62,5				MLH1	c.793C>T	p.R265C
Amsterdam-II	63	63-1	yes (positive)			C18.3	Malignant neoplasm of hepatic flexure	39,6	MSI-H	0%	0%	MLH1	c.793C>A	p.R265S								21.16
Amsterdam-II	63	63-2	no			C18.2	Malignant neoplasm of ascending colon	42,1				MLH1	c.793C>A	p.R265S
Amsterdam-II	63	63-3	no			C18.9	Malignant neoplasm of colon, unspecified	unknown				MLH1	c.793C>A	p.R265S
Bethesda	64	64-1	yes (positive)			C18.0	Malignant neoplasm of caecum	29,5	MSS	>10%/positive		MLH1	c.803A>G	p.E268G						0.04	1.95	5.2	[22]		[22]
Bethesda	65	65-1	yes (positive)			C18.7	Malignant neoplasm of sigmoid colon	34,8	MSI-H	0%		MLH1	c.875T>C	p.L292P						0.04	1.67	9.75
Bethesda	65	65-2	no			C18.9	Malignant neoplasm of colon, unspecified	< 43				MLH1	c.875T>C	p.L292P
Bethesda	65	65-3	no			C80	Malignant neoplasms of ill-defined, secondary and unspecified sites	unknown				MLH1	c.875T>C	p.L292P
Bethesda	65	65-4	no			C80	Malignant neoplasms of ill-defined, secondary and unspecified sites	unknown				MLH1	c.875T>C	p.L292P
Amsterdam-II	66	66-1	yes (positive)	MLH1		C18.3	Malignant neoplasm of hepatic flexure	31,9	MSI-H	0%		MLH1	c.977T>C	p.V326A						0	1.33	10.15	[17]	[22]	[16, 22]		[6]
Amsterdam-II	66	66-2	no			C18.9	Malignant neoplasm of colon, unspecified	54,5				MLH1	c.977T>C	p.V326A
Amsterdam-II	66	66-2	no			C18.9	Malignant neoplasm of colon, unspecified	49,5				MLH1	c.977T>C	p.V326A
Amsterdam-II	66	66-2	no			C80	Malignant neoplasms of ill-defined, secondary and unspecified sites	60,5				MLH1	c.977T>C	p.V326A
Amsterdam-II	66	66-3	no			C18.9	Malignant neoplasm of colon, unspecified	51,5				MLH1	c.977T>C	p.V326A
Amsterdam-II	66	66-4	yes (positive)	MLH1		C54.1	Malignant neoplasm of endometrium	40,9				MLH1	c.977T>C	p.V326A
Amsterdam-II	66	66-5	no			C18.9	Malignant neoplasm of colon, unspecified	57,5				MLH1	c.977T>C	p.V326A
Amsterdam-II	66	66-6	no			C18.9	Malignant neoplasm of colon, unspecified	39,5				MLH1	c.977T>C	p.V326A
Amsterdam-II	66	66-7	no			C18.9	Malignant neoplasm of colon, unspecified	36,5				MLH1	c.977T>C	p.V326A
Amsterdam-II	66	66-8	no			C18.9	Malignant neoplasm of colon, unspecified	55,5				MLH1	c.977T>C	p.V326A
Amsterdam-II	66	66-9	no			C18.9	Malignant neoplasm of colon, unspecified	47,5				MLH1	c.977T>C	p.V326A
Amsterdam-II	67	67-1	yes (positive)			C18.4	Malignant neoplasm of transverse colon	48,8	MSI-H	>0-1%		MLH1	c.986A>C	p.H329P					aberrant splicing			7.22	[18]	[22]	[22]				[18]
Amsterdam-II	67	67-2	no			C18.9	Colorectal carcinoma	unknown				MLH1	c.986A>C	p.H329P
Amsterdam-II	67	67-3	no			C18.9	Colorectal carcinoma	52,5				MLH1	c.986A>C	p.H329P
Amsterdam-II	67	67-4	no			C18.9	Colorectal carcinoma	unknown				MLH1	c.986A>C	p.H329P
Amsterdam-II	67	67-5	no			C18.9	Malignant neoplasm of colon, unspecified	unknown				MLH1	c.986A>C	p.H329P
Amsterdam-II	68	68-1	yes (positive)			C18.2	Malignant neoplasm of ascending colon	59,5	MSI-H	0%		MLH1	c.986A>C	p.H329P
Amsterdam-II	68	68-1	yes (positive)			C18.7	Malignant neoplasm of sigmoid colon	32,1				MLH1	c.986A>C	p.H329P
Amsterdam-II	68	68-2	no			C18.9	Malignant neoplasm of colon, unspecified	61,5				MLH1	c.986A>C	p.H329P
Amsterdam-II	68	68-3	no			C18.9	Malignant neoplasm of colon, unspecified	unknown				MLH1	c.986A>C	p.H329P
Amsterdam-II	68	68-4	no			C18.9	Malignant neoplasm of colon, unspecified	43,5				MLH1	c.986A>C	p.H329P
Amsterdam-II	68	68-5	no			C17	Malignant neoplasm of small intestine	43,5				MLH1	c.986A>C	p.H329P
Bethesda	69	69-1	yes (positive)			C18.9	Malignant neoplasm of colon, unspecified	34,5				MLH1	c.986A>C	p.H329P
Bethesda	69	69-1	yes (positive)			C54.1	Malignant neoplasm of endometrium	< 47,1		0%	0%	MLH1	c.986A>C	p.H329P
Bethesda	69	69-2	no			C16	Malignant neoplasm of stomach	72,5				MLH1	c.986A>C	p.H329P
Bethesda	69	69-3	no			C50	Malignant neoplasm of breast	unknown				MLH1	c.986A>C	p.H329P
Amsterdam-II	16	16-1	yes (positive)		p.N64S	C17.0	Malignant neoplasm of duodenum	47,4				MLH1	c.191A>G	p.H329P						0	1.96	11.5
Amsterdam-II	16	16-1	yes (positive)			C18.0	Malignant neoplasm of caecum	47,4	MSI-H	0%		MLH1	c.191A>G	p.H329P
Amsterdam-II	16	16-1	yes (positive)			C18.2	Malignant neoplasm of ascending colon	47,4				MLH1	c.191A>G	p.H329P
Amsterdam-II	16	16-2	no			C16.0	Malignant neoplasm of cardia	43,5				MLH1	c.191A>G	p.H329P
Amsterdam-II	16	16-2	no			C18.9	Malignant neoplasm of colon, unspecified	43,5				MLH1	c.191A>G	p.H329P
Amsterdam-II	16	16-3	yes (positive)				none	unknown				MLH1	c.191A>G	p.H329P
Amsterdam-II	16	16-4	no			C18.9	Malignant neoplasm of colon, unspecified	68,5				MLH1	c.191A>G	p.H329P
Amsterdam-II	16	16-5	no			C34	Malignant neoplasm of bronchus and lung	>= 75				MLH1	c.191A>G	p.H329P
Amsterdam-II	16	16-6	no			C18.9	Malignant neoplasm of colon, unspecified	unknown				MLH1	c.191A>G	p.H329P
Bethesda	70	70-1	yes (positive)			C18.0	Malignant neoplasm of caecum	33	MSI-H	0%	0%	MLH1	c.1013A>G	p.N338S								2.78
Bethesda	70	70-2	no			C43	Melanoma and other malignant neoplasms of skin	unknown				MLH1	c.1013A>G	p.N338S
Bethesda	70	70-3	no			C18.9	Malignant neoplasm of colon, unspecified	80,5				MLH1	c.1013A>G	p.N338S
Bethesda	70	70-4	no			C61	Malignant neoplasm of prostate	80,5				MLH1	c.1013A>G	p.N338S
Bethesda	70	70-5	no			C43	Melanoma and other malignant neoplasms of skin	unknown				MLH1	c.1013A>G	p.N338S
Bethesda	70	70-6	no			C18.9	Malignant neoplasm of colon, unspecified	50,5				MLH1	c.1013A>G	p.N338S
Amsterdam-II	71	71-1	yes (positive)			C18.6	Malignant neoplasm of descending colon	56,6	MSI-H	0%		MLH1	c.1038G>C	p.Q346H								1.85
Amsterdam-II	71	71-2	no			C16	Malignant neoplasm of stomach	62,5				MLH1	c.1038G>C	p.Q346H
Amsterdam-II	71	71-2	no			C18.9	Malignant neoplasm of colon, unspecified	50,5				MLH1	c.1038G>C	p.Q346H
Amsterdam-II	71	71-3	no			C18.9	Malignant neoplasm of colon, unspecified	38,5				MLH1	c.1038G>C	p.Q346H
Amsterdam-II	72	72-1	no			C18.7	Malignant neoplasm of sigmoid colon	62,3	MSS	>10%/positive		MLH1	c.1038G>C	p.Q346H
Amsterdam-II	72	72-2	no			C18.9	Malignant neoplasm of colon, unspecified	70,5				MLH1	c.1038G>C	p.Q346H
Amsterdam-II	72	72-2	no			C50.9	Malignant neoplasm of breast, unspecified	60,5				MLH1	c.1038G>C	p.Q346H
Amsterdam-II	72	72-3	yes (positive)	MLH1		C18.0	Malignant neoplasm of caecum	48,2				MLH1	c.1038G>C	p.Q346H
Amsterdam-II	72	72-4	no			C18.9	Malignant neoplasm of colon, unspecified	40,5				MLH1	c.1038G>C	p.Q346H
keins	73	73-1	yes (positive)			C16.2	Malignant neoplasm of body of stomach	27,6	MSS			MLH1	c.1136A>G	p.Y379C								2.45
Bethesda	74	74-1	yes (positive)			C18.4	Malignant neoplasm of transverse colon	45	MSI-H	0%		MLH1	c.1268G>A	p.R423K								2.63
Bethesda	74	74-2	no			C96.9	Malignant neoplasm of lymphoid, haematopoietic and related tissue	unknown				MLH1	c.1268G>A	p.R423K
Bethesda	75	75-1	no			C20	Malignant neoplasm of rectum	68,5				MLH1	c.1321G>A	p.A441T						0.56	1.09	2.32	[22]		[22]
Bethesda	75	75-2	no			C20	Malignant neoplasm of rectum	69,5				MLH1	c.1321G>A	p.A441T
Bethesda	75	75-3	yes (positive)			C20	Malignant neoplasm of rectum	55,9	MSI-H	>10%/positive	>10%/positive	MLH1	c.1321G>A	p.A441T
Bethesda	76	76-1	yes (positive)			C18.0	Malignant neoplasm of caecum	41,5	MSI-H			MLH1	c.1321G>A	p.A441T
Bethesda	76	76-1	yes (positive)			C18.7	Malignant neoplasm of sigmoid colon	44				MLH1	c.1321G>A	p.A441T
Bethesda	76	76-2	no			C44.3	Malignant neoplasm of skin of other and unspecified parts of face	unknown				MLH1	c.1321G>A	p.A441T
Bethesda	76	76-3	no			C16.9	Malignant neoplasm of malignant neoplasm of stomach, unspecified	33,5				MLH1	c.1321G>A	p.A441T
Bethesda	76	76-4	no			C18.9	Malignant neoplasm of colon, unspecified	40,5				MLH1	c.1321G>A	p.A441T
Bethesda	76	76-4	no			C50.9	Malignant neoplasm of breast, unspecified	50,5				MLH1	c.1321G>A	p.A441T
Bethesda	76	76-5	no			C18.9	Malignant neoplasm of colon, unspecified	58,5				MLH1	c.1321G>A	p.A441T
Bethesda	76	76-6	no			C57.9	Malignant neoplasm of female genital organ, unspecified	40,5				MLH1	c.1321G>A	p.A441T
Bethesda	76	76-7	no			C50.9	Malignant neoplasm of breast, unspecified	36,5				MLH1	c.1321G>A	p.A441T
Bethesda	77	77-1	yes (positive)			C18.2	Malignant neoplasm of ascending colon	31,8	MSI-H	0%	0%	MLH1	c.1321G>A	p.A441T
Bethesda	77	77-2	no			C34	Malignant neoplasm of bronchus and lung	unknown				MLH1	c.1321G>A	p.A441T
none	78	78-1	yes (positive)	MSH2		C64	Malignant neoplasm of urinary tract	< 38,6	MSS	>10%/positive	>10%/positive	MLH1	c.1321G>A	p.A441T
none	78	78-2	no			C18.9	Malignant neoplasm of colon, unspecified	52,5				MLH1	c.1321G>A	p.A441T
none	78	78-3	no			C73	Malignant neoplasms of thyroid and other endocrine glands	unknown				MLH1	c.1321G>A	p.A441T
none	78	78-4	no			C16	Malignant neoplasm of stomach	unknown				MLH1	c.1321G>A	p.A441T
none	78	78-5	no			C54.1	Malignant neoplasm of endometrium	unknown				MLH1	c.1321G>A	p.A441T
none	79	79-1	yes (positive)				none	unknown				MLH1	c.1321G>A	p.A441T
none	79	79-2	no			C18.9	Malignant neoplasm of colon, unspecified	unknown				MLH1	c.1321G>A	p.A441T
none	79	79-3	no			C18.9	Malignant neoplasm of colon, unspecified	unknown				MLH1	c.1321G>A	p.A441T
none	79	79-4	no			C18.9	Malignant neoplasm of colon, unspecified	unknown				MLH1	c.1321G>A	p.A441T
Bethesda	80	80-1	yes (positive)			C18.4	Malignant neoplasm of transverse colon	54,3	MSI-H	0%		MLH1	c.1321G>A	p.A441T
Bethesda	80	80-1	yes (positive)			C54.1	Malignant neoplasm of endometrium	46,7				MLH1	c.1321G>A	p.A441T
Bethesda	80	80-1	yes (positive)			C56	Malignant neoplasm of ovary	48,7				MLH1	c.1321G>A	p.A441T
Bethesda	80	80-2	no			C25.9	Malignant neoplasm of pancreas, unspecified	44,5				MLH1	c.1321G>A	p.A441T
Bethesda	81	81-1	yes (positive)			C19	Malignant neoplasm of rectosigmoid junction	41,7	MSI-H	0%		MLH1	c.1321G>A	p.A441T
Bethesda	81	81-2	no			C57.9	Malignant neoplasm of female genital organ, unspecified	73,5				MLH1	c.1321G>A	p.A441T
Bethesda	10	10-1	yes (positive)		p.A31C	D12.6	Adenoma	unknown				MLH1	c.1360G>C	p.G454R								4.47
Bethesda	10	10-2	yes (positive)		p.A31C		none	unknown				MLH1	c.1360G>C	p.G454R
Bethesda	10	10-3	no				Carcinoma	unknown				MLH1	c.1360G>C	p.G454R
Bethesda	10	10-3	no			C18.9	Malignant neoplasm of colon, unspecified	39,5				MLH1	c.1360G>C	p.G454R
Bethesda	10	10-4	no			C54.1	Malignant neoplasm of endometrium	42,5				MLH1	c.1360G>C	p.G454R
Bethesda	82	82-1	yes (positive)	MSH6		C18.7	Malignant neoplasm of sigmoid colon	39,9	MSI-H	>10%/positive		MLH1	c.1474G>A	p.A492T						0.68	0.86	2.75	[22]		[22]	[16]	[6]
Bethesda	82	82-2	no			C16	Malignant neoplasm of stomach	< 78				MLH1	c.1474G>A	p.A492T
Bethesda	82	82-3	no			C16	Malignant neoplasm of stomach	< 78				MLH1	c.1474G>A	p.A492T
Bethesda	83	83-1	yes (positive)			C18.2	Malignant neoplasm of ascending colon	43,5	MSI-H	0%	0%	MLH1	c.1559T>G	p.V520G					normal splicing [40]			2.85
Bethesda	83	83-2	no			C34.9	Malignant neoplasm of bronchus or lung, unspecified	unknown				MLH1	c.1559T>G	p.V520G
Bethesda	83	83-3	no			C61	Malignant neoplasm of prostate	60,5				MLH1	c.1559T>G	p.V520G
Bethesda	83	83-4	no			C18.9	Malignant neoplasm of colon, unspecified	unknown				MLH1	c.1559T>G	p.V520G
Amsterdam-II	84	84-1	yes (positive)	MSH2		C18.7	Malignant neoplasm of sigmoid colon	32				MLH1	c.1633A>G	p.T545A								4,65 bord
Amsterdam-II	84	84-1	yes (positive)	MSH2		C50	Malignant neoplasm of breast	43,6				MLH1	c.1633A>G	p.T545A
Amsterdam-II	84	84-2	no			C18.9	Malignant neoplasm of colon, unspecified	46,5				MLH1	c.1633A>G	p.T545A
Amsterdam-II	84	84-2	no			C53	Malignant neoplasm of cervix uteri	45,5				MLH1	c.1633A>G	p.T545A
Amsterdam-II	84	84-3	no			C18.9	Malignant neoplasm of colon, unspecified	49,5				MLH1	c.1633A>G	p.T545A
Amsterdam-II	85	85-1	yes (positive)			C18.2	Malignant neoplasm of ascending colon	45,7				MLH1	c.1649T>C	p.L550P	14	0	reduced	22		0	1.704	8.8	[18]						[18]
Amsterdam-II	85	85-1	yes (positive)			C18.4	Malignant neoplasm of transverse colon	45,7	MSI-H	0%		MLH1	c.1649T>C	p.L550P
Amsterdam-II	85	85-2	no			C18.9	Malignant neoplasm of colon, unspecified	45,5				MLH1	c.1649T>C	p.L550P
Amsterdam-II	85	85-3	no			C18.9	Malignant neoplasm of colon, unspecified	25,5				MLH1	c.1649T>C	p.L550P
Amsterdam-II	85	85-4	no			C19	Malignant neoplasm of rectosigmoid junction	38,5				MLH1	c.1649T>C	p.L550P
Amsterdam-II	86	86-1	yes (positive)			C18.7	Malignant neoplasm of sigmoid colon	43,5	MSI-H	>10%/positive	>10%/positive	MLH1	c.1652A>G	p.N551S	64	140	reduced	7		0.03	1.891	7.9
Amsterdam-II	86	86-2	no			C18.9	Colorectal carcinoma	72,5				MLH1	c.1652A>G	p.N551S
Amsterdam-II	86	86-3	no			C44.9	Malignant neoplasm of skin, unspecified	< 83,2				MLH1	c.1652A>G	p.N551S
Amsterdam-II	86	86-3	no			C54.1	Malignant neoplasm of endometrium	< 83,2				MLH1	c.1652A>G	p.N551S
Amsterdam-II	86	86-4	no			C18.9	Colorectal carcinoma	75,5				MLH1	c.1652A>G	p.N551S
Amsterdam-II	86	86-5	no			C34	Malignant neoplasm of bronchus and lung	unknown				MLH1	c.1652A>G	p.N551S
Amsterdam-II	86	86-6	no			C55	Malignant neoplasm of uterus, part unspecified	unknown				MLH1	c.1652A>G	p.N551S
Amsterdam-II	86	86-7	no			C18.9	Colorectal carcinoma	unknown				MLH1	c.1652A>G	p.N551S
Amsterdam-II	86	86-8	no			C71	Malignant neoplasm of brain	unknown				MLH1	c.1652A>G	p.N551S
Bethesda	87	87-1	yes (positive)	MLH1		C18.6	Malignant neoplasm of descending colon	45,1	MSI-H	>10%/positive	>10%/positive	MLH1	c.1667G>C	p.S556T								2.55
Bethesda	87	87-2	no			C18.9	Malignant neoplasm of colon, unspecified	8,5				MLH1	c.1667G>C	p.S556T
Bethesda	87	87-3	no			C34	Malignant neoplasm of bronchus and lung	< 68				MLH1	c.1667G>C	p.S556T
Bethesda	87	87-4	no			C18.9	Malignant neoplasm of colon, unspecified	< 86,2				MLH1	c.1667G>C	p.S556T
Amsterdam-II	88	88-1	no			C44.9	Malignant neoplasm of skin, unspecified	59,5				MLH1	c.1676T>C	p.L559P								12.4
Amsterdam-II	88	88-1	no			C61	Malignant neoplasm of prostate	59,5				MLH1	c.1676T>C	p.L559P
Amsterdam-II	88	88-2	yes (positive)			C18.0	Malignant neoplasm of caecum	77,9	MSI-H			MLH1	c.1676T>C	p.L559P
Amsterdam-II	88	88-3	no			C17.9	Malignant neoplasm of small intestine, unspecified	40,5				MLH1	c.1676T>C	p.L559P
Amsterdam-II	88	88-3	no			C76.2	Malignant neoplasm of abdomen	40,5				MLH1	c.1676T>C	p.L559P
Amsterdam-II	88	88-4	no			C50.9	Malignant neoplasm of breast, unspecified	60,5				MLH1	c.1676T>C	p.L559P
Amsterdam-II	88	88-5	no			C17.9	Malignant neoplasm of small intestine, unspecified	22,5				MLH1	c.1676T>C	p.L559P
Bethesda	89	89-1	yes (positive)			C18.4	Malignant neoplasm of transverse colon	52,7	MSI-H	0%	0%	MLH1	c.1685A>C	p.Q562P	15	0.1	reduced	26	normal splicing [40]	0	2.951	22.16
Bethesda	89	89-1	yes (positive)			C20	Malignant neoplasm of rectum	34,6				MLH1	c.1685A>C	p.Q562P
Amsterdam-II	90	90-1	yes (positive)	MSH2		C18.9	Malignant neoplasm of colon, unspecified	50,2	MSI-H			MLH1	c.1693A>T	p.I565F								6.37		[22]		[22]
Amsterdam-II	90	90-1	yes (positive)	MSH2		C54.1	Malignant neoplasm of endometrium	45,4				MLH1	c.1693A>T	p.I565F
Amsterdam-II	90	90-1	yes (positive)	MSH2		D23.6	Benignant neoplasm of skin of upper limb, including shoulder	50,5				MLH1	c.1693A>T	p.I565F
Amsterdam-II	90	90-2	no			C18.9	Malignant neoplasm of colon, unspecified	< 50,2				MLH1	c.1693A>T	p.I565F
Amsterdam-II	90	90-3	no			C18.9	Malignant neoplasm of colon, unspecified	< 38				MLH1	c.1693A>T	p.I565F
Amsterdam-II	90	90-4	no			C18.9	Malignant neoplasm of colon, unspecified	unknown				MLH1	c.1693A>T	p.I565F
Amsterdam-II	90	90-5	no			C18.9	Malignant neoplasm of colon, unspecified	47,5				MLH1	c.1693A>T	p.I565F
Amsterdam-II	90	90-6	no			C54.1	Malignant neoplasm of endometrium	45,5				MLH1	c.1693A>T	p.I565F
Amsterdam-II	90	90-7	no			C54.1	Malignant neoplasm of endometrium	36,5				MLH1	c.1693A>T	p.I565F
Amsterdam-II	90	90-8	no			C18.9	Malignant neoplasm of colon, unspecified	24,5				MLH1	c.1693A>T	p.I565F
Bethesda	91	91-1	yes (positive)			C20	Malignant neoplasm of rectum	40,4	MSS	>10%/positive		MLH1	c.1733A>G	p.E578G								4.85		[22]	[22]	[16]
Amsterdam-II	92	92-1	yes (positive)		p.V716M	C18.2	Malignant neoplasm of ascending colon	47				MLH1	c.1742C>T	p.P581L								3.27
Amsterdam-II	92	92-1	yes (positive)			C18.9	Malignant neoplasm of colon, unspecified	60				MLH1	c.1742C>T	p.P581L
Amsterdam-II	92	92-1	yes (positive)			C56	Malignant neoplasm of ovary	50				MLH1	c.1742C>T	p.P581L
Amsterdam-II	92	92-2	no			C18.9	Malignant neoplasm of colon, unspecified	60,5				MLH1	c.1742C>T	p.P581L
Amsterdam-II	92	92-3	no			C18.9	Malignant neoplasm of colon, unspecified	43,5				MLH1	c.1742C>T	p.P581L
Amsterdam-II	92	92-4	no			C18.9	Malignant neoplasm of colon, unspecified	unknown				MLH1	c.1742C>T	p.P581L
Amsterdam-II	92	92-5	no			C18.9	Malignant neoplasm of colon, unspecified	50,5				MLH1	c.1742C>T	p.P581L
Bethesda	93	93-1	yes (positive)			C18.2	Malignant neoplasm of ascending colon	53,9		0%	0%	MLH1	c.1745T>C	p.L582P	4	0	reduced	4		0	2.434	9.43
Bethesda	93	93-1	yes (positive)			C18.4	Malignant neoplasm of transverse colon	42,4				MLH1	c.1745T>C	p.L582P
Bethesda	93	93-2	no			C44.2	Malignant neoplasm of skin of ear and external auricular canal	71,5				MLH1	c.1745T>C	p.L582P
Bethesda	93	93-2	no			C67	Malignant neoplasm of bladder	< 77				MLH1	c.1745T>C	p.L582P
Bethesda	93	93-3	no			C18.9	Malignant neoplasm of colon, unspecified	50,5				MLH1	c.1745T>C	p.L582P
Bethesda	93	93-4	no			C50	Malignant neoplasm of breast	70,5				MLH1	c.1745T>C	p.L582P
Bethesda	93	93-5	no			C16	Malignant neoplasm of stomach	40,5				MLH1	c.1745T>C	p.L582P
Bethesda	93	93-6	no			C16	Malignant neoplasm of stomach	70,5				MLH1	c.1745T>C	p.L582P
Bethesda	93	93-7	no			C16	Malignant neoplasm of stomach	unknown				MLH1	c.1745T>C	p.L582P
Amsterdam-II	94	94-1	yes (positive)			C18.7	Malignant neoplasm of sigmoid colon	37,5				MLH1	c.1745T>C	p.L582P
Amsterdam-II	94	94-1	yes (positive)			C20	Malignant neoplasm of rectum	47,8				MLH1	c.1745T>C	p.L582P
Amsterdam-II	94	94-1	yes (positive)			C61	Malignant neoplasm of prostate	47,8				MLH1	c.1745T>C	p.L582P
Amsterdam-II	94	94-2	no			C18.9	Malignant neoplasm of colon, unspecified	53,5				MLH1	c.1745T>C	p.L582P
Amsterdam-II	94	94-3	no			C18.9	Malignant neoplasm of colon, unspecified	55,5				MLH1	c.1745T>C	p.L582P
Amsterdam-II	94	94-4	yes (positive)			C54	Malignant neoplasm of corpus uteri	44,2				MLH1	c.1745T>C	p.L582P
Amsterdam-II	94	94-5	no			C18.0	Malignant neoplasm of caecum	47,5				MLH1	c.1745T>C	p.L582P
Amsterdam-II	94	94-5	no			C18.6	Malignant neoplasm of descending colon	51,5				MLH1	c.1745T>C	p.L582P
Amsterdam-II	94	94-5	no			C18.7	Malignant neoplasm of sigmoid colon	48,5				MLH1	c.1745T>C	p.L582P
Bethesda	95	95-1	yes (positive)			C18.2	Malignant neoplasm of ascending colon	48,2	MSI-H			MLH1	c.1745T>C	p.L582P
Bethesda	95	95-1	yes (positive)			C18.6	Malignant neoplasm of descending colon	42,9	MSI-H	0%		MLH1	c.1745T>C	p.L582P
Bethesda	95	95-2	no			C57.9	Malignant neoplasm of female genital organ, unspecified	54,5				MLH1	c.1745T>C	p.L582P
Bethesda	95	95-3	no			C18.9	Malignant neoplasm of colon, unspecified	49,5				MLH1	c.1745T>C	p.L582P
Bethesda	95	95-4	no			C57.9	Malignant neoplasm of female genital organ, unspecified	56,5				MLH1	c.1745T>C	p.L582P
Amsterdam-II	96	96-1	yes (positive)			C18.9	Malignant neoplasm of colon, unspecified	32,1				MLH1	c.1756G>C	p.A586P	4	0	reduced	37		0.25	1.596	9.17		[21, 22]		[22]
Amsterdam-II	96	96-1	yes (positive)			C20	Malignant neoplasm of rectum	61,1	MSI-H	0%		MLH1	c.1756G>C	p.A586P
Amsterdam-II	96	96-1	yes (positive)			C50	Malignant neoplasm of breast	62,1				MLH1	c.1756G>C	p.A586P
Amsterdam-II	96	96-1	yes (positive)			C54.1	Malignant neoplasm of endometrium	37,1				MLH1	c.1756G>C	p.A586P
Amsterdam-II	96	96-2	no			C57.9	Malignant neoplasm of female genital organ, unspecified	40,5				MLH1	c.1756G>C	p.A586P
Amsterdam-II	96	96-3	no			C18.9	Malignant neoplasm of colon, unspecified	40,5				MLH1	c.1756G>C	p.A586P
Amsterdam-II	96	96-4	no			C18.9	Malignant neoplasm of colon, unspecified	40,5				MLH1	c.1756G>C	p.A586P
Amsterdam-II	96	96-5	no			C18.9	Malignant neoplasm of colon, unspecified	60,5				MLH1	c.1756G>C	p.A586P
Amsterdam-II	96	96-6	no			C18.9	Malignant neoplasm of colon, unspecified	65,5				MLH1	c.1756G>C	p.A586P
Amsterdam-II	96	96-6	no			C18.9	Malignant neoplasm of colon, unspecified	35,5				MLH1	c.1756G>C	p.A586P
Amsterdam-II	96	96-7	no			C16	Malignant neoplasm of stomach	62,5				MLH1	c.1756G>C	p.A586P
Amsterdam-II	96	96-7	no			C18.9	Malignant neoplasm of colon, unspecified	55,5				MLH1	c.1756G>C	p.A586P
Amsterdam-II	96	96-7	no			C54.1	Malignant neoplasm of endometrium	40,5				MLH1	c.1756G>C	p.A586P
Amsterdam-II	96	96-8	no			C20	Malignant neoplasm of rectum	32,5				MLH1	c.1756G>C	p.A586P
Amsterdam-II	97	97-1	yes (positive)			C18.0	Malignant neoplasm of caecum	41,1				MLH1	c.1763T>C	p.L588P								3.59	[22]			[22]
Amsterdam-II	97	97-2	no			C67	Malignant neoplasm of bladder	53,4				MLH1	c.1763T>C	p.L588P
Amsterdam-II	97	97-3	no			C18.9	Malignant neoplasm of colon, unspecified	< 43				MLH1	c.1763T>C	p.L588P
Amsterdam-II	97	97-4	no			C18.9	Malignant neoplasm of colon, unspecified	69,5				MLH1	c.1763T>C	p.L588P
Amsterdam-II	97	97-5	no			C18.9	Malignant neoplasm of colon, unspecified	< 56				MLH1	c.1763T>C	p.L588P
Amsterdam-II	97	97-6	no			C18.9	Malignant neoplasm of colon, unspecified	unknown				MLH1	c.1763T>C	p.L588P
Amsterdam-II	97	97-7	no			C18.9	Malignant neoplasm of colon, unspecified	82				MLH1	c.1763T>C	p.L588P
Bethesda	98	98-1	yes (positive)			C18.2	Malignant neoplasm of ascending colon	34	MSI-H	0%		MLH1	c.1766C>A	p.A589D	3	0	reduced	10		0.12	1.446	8.3	[18]						[18]
Bethesda	98	98-2	no			C18.9	Malignant neoplasm of colon, unspecified	unknown				MLH1	c.1766C>A	p.A589D
Bethesda	98	98-3	no			C18.9	Malignant neoplasm of colon, unspecified	unknown				MLH1	c.1766C>A	p.A589D
Bethesda	99	99-1	yes (positive)			C18.7	Malignant neoplasm of sigmoid colon	44,4	MSI-H	>10%/positive		MLH1	c.1808C>G	p.P603R	77	79	like wt	78		0.37	2.006	not available	[22]		[22]
Bethesda	99	99-2	no			C16.9	Malignant neoplasm of malignant neoplasm of stomach, unspecified	68,5				MLH1	c.1808C>G	p.P603R
Amsterdam-II	100	100-1	yes (positive)	MSH6		C18.2	Malignant neoplasm of ascending colon	43,9	MSI-H	>10%/positive	>10%/positive	MLH1	c.1852_1853delAAinsGC	p.K618A					normal splicing [40]			5.06	[18, 21, 22]	[22]					[18]
Amsterdam-II	100	100-1	yes (positive)	MSH6		C25.2	Malignant neoplasm of tail of pancreas	45	MSI-H	>10%/positive	>0-1%	MLH1	c.1852_1853delAAinsGC	p.K618A
Amsterdam-II	100	100-2	no			C54.1	Malignant neoplasm of endometrium	56,5				MLH1	c.1852_1853delAAinsGC	p.K618A
Amsterdam-II	100	100-3	no			C34	Malignant neoplasm of bronchus and lung	unknown				MLH1	c.1852_1853delAAinsGC	p.K618A
Amsterdam-II	100	100-4	no			C18.7	Malignant neoplasm of sigmoid colon	58,5				MLH1	c.1852_1853delAAinsGC	p.K618A
Amsterdam-II	100	100-5	no			C50	Malignant neoplasm of breast	< 58				MLH1	c.1852_1853delAAinsGC	p.K618A
Amsterdam-II	100	100-5	no			C18.9	Colorectal carcinoma	< 58				MLH1	c.1852_1853delAAinsGC	p.K618A
Amsterdam-II	101	101-1	no			C18.9	Malignant neoplasm of colon, unspecified	< 59				MLH1	c.1852_1853delAAinsGC	p.K618A
Amsterdam-II	101	101-2	yes (negative)			C54.1	Malignant neoplasm of endometrium	57,3				MLH1	c.1852_1853delAAinsGC	p.K618A
Amsterdam-II	101	101-3	yes (positive)	MLH1		C18.2	Malignant neoplasm of ascending colon	37,2				MLH1	c.1852_1853delAAinsGC	p.K618A
Amsterdam-II	101	101-3	yes (positive)	MLH1		C54.1	Malignant neoplasm of endometrium	59,2	MSI-H	0%		MLH1	c.1852_1853delAAinsGC	p.K618A
Amsterdam-II	101	101-4	no			C71.6	Malignant neoplasm of cerebellum	< 15				MLH1	c.1852_1853delAAinsGC	p.K618A
Bethesda	102	102-1	yes (positive)			C18.2	Malignant neoplasm of ascending colon	43,6	MSI-H	>10%/positive		MLH1	c.1852_1853delAAinsGC	p.K618A
Bethesda	102	102-2	no			C18.9	Malignant neoplasm of colon, unspecified	< 41				MLH1	c.1852_1853delAAinsGC	p.K618A
Bethesda	103	103-1	yes (positive)			C18.2	Malignant neoplasm of ascending colon	45,7	MSI-H	0%	0%	MLH1	c.1852_1853delAAinsGC	p.K618A
Bethesda	103	103-2	no			C73	Malignant neoplasms of thyroid and other endocrine glands	31,5				MLH1	c.1852_1853delAAinsGC	p.K618A
Bethesda	103	103-3	no			C22	Malignant neoplasm of liver and intrahepatic bile ducts	75,5				MLH1	c.1852_1853delAAinsGC	p.K618A
Bethesda	103	103-4	no			C24.0	Malignant neoplasm of extrahepatic bile duct	81,5				MLH1	c.1852_1853delAAinsGC	p.K618A
Bethesda	103	103-5	no			C50	Malignant neoplasm of breast	38,5				MLH1	c.1852_1853delAAinsGC	p.K618A
Bethesda	103	103-6	no			C50	Malignant neoplasm of breast	55,5				MLH1	c.1852_1853delAAinsGC	p.K618A
Amsterdam-II	104	104-1	no			C18.9	Malignant neoplasm of colon, unspecified	76,5				MLH1	c.1852_1853delAAinsGC	p.K618A
Amsterdam-II	104	104-2	no			C61	Malignant neoplasm of prostate	70,5				MLH1	c.1852_1853delAAinsGC	p.K618A
Amsterdam-II	104	104-3	no			C18.9	Malignant neoplasm of colon, unspecified	59,5				MLH1	c.1852_1853delAAinsGC	p.K618A
Amsterdam-II	104	104-4	yes (positive)			C20	Malignant neoplasm of rectum	46,1				MLH1	c.1852_1853delAAinsGC	p.K618A
Bethesda	105	105-1	yes (positive)			C18.2	Malignant neoplasm of ascending colon	30,7	MSI-H	0%		MLH1	c.1852_1853delAAinsGC	p.K618A
Bethesda	105	105-2	no			C53	Malignant neoplasm of cervix uteri	25,5				MLH1	c.1852_1853delAAinsGC	p.K618A
Bethesda	106	106-1	yes (positive)			C20	Malignant neoplasm of rectum	33,5				MLH1	c.1852_1853delAAinsGC	p.K618A
Bethesda	106	106-1	yes (positive)			C20	Malignant neoplasm of rectum	33,6				MLH1	c.1852_1853delAAinsGC	p.K618A
Bethesda	106	106-2	no			C18.9	Malignant neoplasm of colon, unspecified	< 76,2				MLH1	c.1852_1853delAAinsGC	p.K618A
Bethesda	106	106-3	no			C67.9	Malignant neoplasm of bladder, unspecified	60,5				MLH1	c.1852_1853delAAinsGC	p.K618A
Bethesda	106	106-4	no			C50.9	Malignant neoplasm of breast, unspecified	56,5				MLH1	c.1852_1853delAAinsGC	p.K618A
Bethesda	106	106-5	no			C18.9	Malignant neoplasm of colon, unspecified	58,5				MLH1	c.1852_1853delAAinsGC	p.K618A
Bethesda	106	106-6	no			C18.9	Malignant neoplasm of colon, unspecified	42,5				MLH1	c.1852_1853delAAinsGC	p.K618A
Bethesda	106	106-6	no			C50.9	Malignant neoplasm of breast, unspecified	37,5				MLH1	c.1852_1853delAAinsGC	p.K618A
Amsterdam-II	107	107-1	yes (positive)	MLH1		C18.2	Malignant neoplasm of ascending colon	36,3	MSI-H	0%		MLH1	c.1852_1853delAAinsGC	p.K618A
Amsterdam-II	107	107-2	no			C18.9	Malignant neoplasm of colon, unspecified	51,5				MLH1	c.1852_1853delAAinsGC	p.K618A
Amsterdam-II	107	107-3	no			C18.9	Malignant neoplasm of colon, unspecified	72,5				MLH1	c.1852_1853delAAinsGC	p.K618A
Amsterdam-II	107	107-4	yes (positive)	MLH1		C18.2	Malignant neoplasm of ascending colon	48,9				MLH1	c.1852_1853delAAinsGC	p.K618A
Amsterdam-II	107	107-5	yes (positive)	MLH1		C18.4	Malignant neoplasm of transverse colon	23,1	MSI-H			MLH1	c.1852_1853delAAinsGC	p.K618A
Amsterdam-II	107	107-6	no			C18.9	Malignant neoplasm of colon, unspecified	32,5				MLH1	c.1852_1853delAAinsGC	p.K618A
Amsterdam-II	107	107-7	no			C18.9	Malignant neoplasm of colon, unspecified	49,5				MLH1	c.1852_1853delAAinsGC	p.K618A
Amsterdam-II	107	107-8	no			C18.9	Malignant neoplasm of colon, unspecified	42,5				MLH1	c.1852_1853delAAinsGC	p.K618A
Amsterdam-II	107	107-9	no			C18.9	Malignant neoplasm of colon, unspecified	62,5				MLH1	c.1852_1853delAAinsGC	p.K618A
Amsterdam-II	107	107-10	no			C18.9	Malignant neoplasm of colon, unspecified	< 81,2				MLH1	c.1852_1853delAAinsGC	p.K618A
Amsterdam-II	107	107-11	no			C18.9	Malignant neoplasm of colon, unspecified	34,5				MLH1	c.1852_1853delAAinsGC	p.K618A
Amsterdam-II	107	107-12	no			C18.9	Malignant neoplasm of colon, unspecified	33,5				MLH1	c.1852_1853delAAinsGC	p.K618A
Amsterdam-II	107	107-12	no			C18.9	Malignant neoplasm of colon, unspecified	42,5				MLH1	c.1852_1853delAAinsGC	p.K618A
Amsterdam-II	107	107-13	no			C80	Malignant neoplasms of ill-defined, secondary and unspecified sites	unknown				MLH1	c.1852_1853delAAinsGC	p.K618A
Amsterdam-II	107	107-14	yes (positive)	MLH1		C18.9	Malignant neoplasm of colon, unspecified	44,4				MLH1	c.1852_1853delAAinsGC	p.K618A
Amsterdam-II	107	107-15	no			C18.9	Malignant neoplasm of colon, unspecified	54,5				MLH1	c.1852_1853delAAinsGC	p.K618A
Bethesda	108	108-1	yes (positive)			C18.6	Malignant neoplasm of descending colon	60,1	MSS	0%		MLH1	c.1852_1853delAAinsGC	p.K618A
Bethesda	108	108-2	yes (negative)			C18.7	Malignant neoplasm of sigmoid colon	27,8				MLH1	c.1852_1853delAAinsGC	p.K618A
Bethesda	109	109-1	yes (positive)			C18.3	Malignant neoplasm of hepatic flexure	38,3	MSS	>10%/positive		MLH1	c.1852_1853delAAinsGC	p.K618A
Bethesda	109	109-2	no			C18.9	Malignant neoplasm of colon, unspecified	48,5				MLH1	c.1852_1853delAAinsGC	p.K618A
Bethesda	110	110-1	yes (positive)	MSH6		C18.6	Malignant neoplasm of descending colon	36	MSI-H	>10%/positive		MLH1	c.1852_1853delAAinsGC	p.K618A
Bethesda	110	110-2	yes (positive)	MSH6		C54.9	Malignant neoplasm of corpus uteri, unspecified	56,5				MLH1	c.1852_1853delAAinsGC	p.K618A
Bethesda	111	111-1	yes (positive)			D12.6	Adenoma	unknown				MLH1	c.1852_1853delAAinsGC	p.K618A
Bethesda	111	111-2	no			C54.1	Malignant neoplasm of endometrium	43,5				MLH1	c.1852_1853delAAinsGC	p.K618A
Bethesda	111	111-3	no			C18.9	Malignant neoplasm of colon, unspecified	70,5				MLH1	c.1852_1853delAAinsGC	p.K618A
Amsterdam-II	112	112-1	yes (positive)		p.Y646C	C18.3	Malignant neoplasm of hepatic flexure	41,9				MLH1	c.1852_1853delAAinsGC	p.K618A								5.02
Amsterdam-II	112	112-1	yes (positive)			C18.4	Malignant neoplasm of transverse colon	65,6	MSS	0%	0%	MLH1	c.1852_1853delAAinsGC	p.K618A
Amsterdam-II	112	112-1	yes (positive)			C64	Malignant neoplasm of urinary tract	49,9				MLH1	c.1852_1853delAAinsGC	p.K618A
Amsterdam-II	112	112-2	no			C18.9	Malignant neoplasm of colon, unspecified	unknown				MLH1	c.1852_1853delAAinsGC	p.K618A
Amsterdam-II	112	112-3	no			C96.7	Other specified malignant neoplasms of lymphoid, haematopoietic and related tissue	69,5				MLH1	c.1852_1853delAAinsGC	p.K618A
Amsterdam-II	112	112-4	no			C18.4	Malignant neoplasm of transverse colon	64,5				MLH1	c.1852_1853delAAinsGC	p.K618A
Amsterdam-II	112	112-4	no			C54.9	Malignant neoplasm of corpus uteri, unspecified	66,5				MLH1	c.1852_1853delAAinsGC	p.K618A
Amsterdam-II	112	112-5	no			C18.9	Malignant neoplasm of colon, unspecified	unknown				MLH1	c.1852_1853delAAinsGC	p.K618A
Amsterdam-II	112	112-6	no			C18.7	Malignant neoplasm of sigmoid colon	38,5				MLH1	c.1852_1853delAAinsGC	p.K618A
Amsterdam-II	112	112-6	no			C20	Malignant neoplasm of rectum	41,5				MLH1	c.1852_1853delAAinsGC	p.K618A
Amsterdam-II	112	112-6	no			C56	Malignant neoplasm of ovary	41,5				MLH1	c.1852_1853delAAinsGC	p.K618A
Amsterdam-II	113	113-1	yes (positive)			C18.2	Malignant neoplasm of ascending colon	46,1	MSI-H	0%		MLH1	c.1853A>G	p.K618R	76	67	like wt	39		0.62	0.216	1.7
Amsterdam-II	113	113-2	no			C18.9	Malignant neoplasm of colon, unspecified	31,5				MLH1	c.1853A>G	p.K618R
Amsterdam-II	113	113-3	no			C18.9	Malignant neoplasm of colon, unspecified	unknown				MLH1	c.1853A>G	p.K618R
Amsterdam-II	113	113-4	no			C57.9	Malignant neoplasm of female genital organ, unspecified	unknown				MLH1	c.1853A>G	p.K618R
Amsterdam-II	113	113-5	no			C18.9	Malignant neoplasm of colon, unspecified	45,5				MLH1	c.1853A>G	p.K618R
Amsterdam-II	113	113-6	no			C18.9	Malignant neoplasm of colon, unspecified	unknown				MLH1	c.1853A>G	p.K618R
Bethesda	114	114-1	no			C18.9	Malignant neoplasm of colon, unspecified	< 35				MLH1	c.1853A>G	p.K618R
Bethesda	114	114-2	yes (positive)	MLH1		C18.2	Malignant neoplasm of ascending colon	28,4	MSI-H	>10%/positive	>10%/positive	MLH1	c.1853A>G	p.K618R
Bethesda	114	114-2	yes (positive)	MLH1		C18.6	Malignant neoplasm of descending colon	34,1		0%	0%	MLH1	c.1853A>G	p.K618R
Bethesda	114	114-2	yes (positive)	MLH1		C85.9	Non-Hodgkin's lymphoma, unspecified type	28,9				MLH1	c.1853A>G	p.K618R
Amsterdam-II	115	115-1	yes (positive)			C18.4	Malignant neoplasm of transverse colon	41	MSI-H	0%	0%	MLH1	c.1855G>C	p.A619P								9.67
Amsterdam-II	115	115-2	no			C18.0	Malignant neoplasm of caecum	32,2	MSI-H	>1-10%	>1-10%	MLH1	c.1855G>C	p.A619P
Amsterdam-II	115	115-3	no			C54.1	Malignant neoplasm of endometrium	38,6				MLH1	c.1855G>C	p.A619P
Amsterdam-II	115	115-4	no			C18.9	Malignant neoplasm of colon, unspecified	unknown				MLH1	c.1855G>C	p.A619P
Bethesda	116	116-1	yes (positive)			C18.3	Malignant neoplasm of hepatic flexure	48,1	MSI-H	>1-10%		MLH1	c.1865T>C	p.L622P								19.94
Bethesda	116	116-1	yes (positive)			C50	Malignant neoplasm of breast	37,1				MLH1	c.1865T>C	p.L622P
Bethesda	116	116-2	no			C16.9	Malignant neoplasm of malignant neoplasm of stomach, unspecified	70,5				MLH1	c.1865T>C	p.L622P
Bethesda	116	116-3	no			C67	Malignant neoplasm of bladder	unknown				MLH1	c.1865T>C	p.L622P
Bethesda	116	116-4	no			C80	Malignant neoplasms of ill-defined, secondary and unspecified sites	unknown				MLH1	c.1865T>C	p.L622P
Amsterdam-II	117	117-1	yes (positive)		p.A623S	C18.2	Malignant neoplasm of ascending colon	43,4	MSI-H	0%	0%	MLH1	c.1865T>C	p.L622P								19.94
Amsterdam-II	117	117-2	no			C18.9	Malignant neoplasm of colon, unspecified	31,5				MLH1	c.1865T>C	p.L622P
Amsterdam-II	117	117-2	no			C18.5	Malignant neoplasm of splenic flexure	49,5				MLH1	c.1865T>C	p.L622P
Amsterdam-II	117	117-3	no			C18.9	Malignant neoplasm of colon, unspecified	69,5				MLH1	c.1865T>C	p.L622P
Amsterdam-II	117	117-4	no			C18.9	Malignant neoplasm of colon, unspecified	78,5				MLH1	c.1865T>C	p.L622P
Amsterdam-II	117	117-5	no			C18.9	Malignant neoplasm of colon, unspecified	unknown				MLH1	c.1865T>C	p.L622P
Amsterdam-II	117	117-1	yes (positive)		p.L622P	C18.2	Malignant neoplasm of ascending colon	43,4	MSI-H	0%	0%	MLH1	c.1867G>T	p.A623S								2.43
Amsterdam-II	117	117-2	no			C18.9	Malignant neoplasm of colon, unspecified	31,5				MLH1	c.1867G>T	p.A623S
Amsterdam-II	117	117-2	no			C18.5	Malignant neoplasm of splenic flexure	49,5				MLH1	c.1867G>T	p.A623S
Amsterdam-II	117	117-3	no			C18.9	Malignant neoplasm of colon, unspecified	69,5				MLH1	c.1867G>T	p.A623S
Amsterdam-II	117	117-4	no			C18.9	Malignant neoplasm of colon, unspecified	78,5				MLH1	c.1867G>T	p.A623S
Amsterdam-II	117	117-5	no			C18.9	Malignant neoplasm of colon, unspecified	unknown				MLH1	c.1867G>T	p.A623S
Bethesda	118	118-1	yes (positive)			C18.0	Malignant neoplasm of caecum	54,9	MSI-H			MLH1	c.1895A>G	p.E632G					aberrant splicing			3,15 bord
Bethesda	118	118-2	no			C71	Malignant neoplasm of brain	< 11				MLH1	c.1895A>G	p.E632G
Bethesda	118	118-3	no			C18.9	Malignant neoplasm of colon, unspecified	< 46				MLH1	c.1895A>G	p.E632G
Bethesda	118	118-4	no			C40.2	Malignant neoplasm of long bones of lower limb	< 80,2				MLH1	c.1895A>G	p.E632G
Bethesda	119	119-1	yes (positive)			C18.0	Malignant neoplasm of caecum	31,4		0%	0%	MLH1	c.1919C>T	p.P640L	3	0	reduced	5		0	3.379	26.9
Bethesda	119	119-2	no			C20	Malignant neoplasm of rectum	29,5				MLH1	c.1919C>T	p.P640L
Bethesda	119	119-3	no			C16	Malignant neoplasm of stomach	55,5				MLH1	c.1919C>T	p.P640L
Bethesda	119	119-4	no			C18.4	Malignant neoplasm of transverse colon	81,5				MLH1	c.1919C>T	p.P640L
Bethesda	120	120-1	yes (positive)			C18.2	Malignant neoplasm of ascending colon	55,1				MLH1	c.1919C>T	p.P640L
Bethesda	120	120-1	yes (positive)			C19	Malignant neoplasm of rectosigmoid junction	48,7	MSI-H	0%		MLH1	c.1919C>T	p.P640L
Bethesda	120	120-2	no			C55	Malignant neoplasm of uterus, part unspecified	unknown				MLH1	c.1919C>T	p.P640L
Bethesda	120	120-3	no			C80	Malignant neoplasms of ill-defined, secondary and unspecified sites	unknown				MLH1	c.1919C>T	p.P640L
Bethesda	120	120-4	no			C18.9	Malignant neoplasm of colon, unspecified	unknown				MLH1	c.1919C>T	p.P640L
Amsterdam-II	121	121-1	yes (positive)		p.V716M	C18.7	Malignant neoplasm of sigmoid colon	63,3				MLH1	c.1918C>T	p.P640S	0	0.1	reduced	23		0	2.929	17.5
Amsterdam-II	121	121-1	yes (positive)			C43	Melanoma and other malignant neoplasms of skin	66,3				MLH1	c.1918C>T	p.P640S
Amsterdam-II	121	121-1	yes (positive)			C56	Malignant neoplasm of ovary	47				MLH1	c.1918C>T	p.P640S
Amsterdam-II	121	121-2	no			C18.9	Malignant neoplasm of colon, unspecified	43,5				MLH1	c.1918C>T	p.P640S
Amsterdam-II	121	121-3	no			C18.9	Malignant neoplasm of colon, unspecified	62,5				MLH1	c.1918C>T	p.P640S
Amsterdam-II	121	121-4	no			C18.9	Malignant neoplasm of colon, unspecified	57,5				MLH1	c.1918C>T	p.P640S
Amsterdam-II	121	121-4	no			C18.9	Malignant neoplasm of colon, unspecified	30,5				MLH1	c.1918C>T	p.P640S
Amsterdam-II	121	121-4	no			C18.9	Malignant neoplasm of colon, unspecified	40,5				MLH1	c.1918C>T	p.P640S
Amsterdam-II	121	121-5	no			C18.9	Malignant neoplasm of colon, unspecified	unknown				MLH1	c.1918C>T	p.P640S
Bethesda	122	122-1	yes (positive)			C18.7	Malignant neoplasm of sigmoid colon	41,8	MSI-H	>10%/positive	>0-1%	MLH1	c.1937A>G	p.Y646C								3.69	[18]						[18]
Bethesda	122	122-2	no			C67	Malignant neoplasm of bladder	59,5				MLH1	c.1937A>G	p.Y646C
Bethesda	122	122-3	no			C18.9	Malignant neoplasm of colon, unspecified	89,5				MLH1	c.1937A>G	p.Y646C
Amsterdam-II	112	112-1	yes (positive)		p.K618A	C18.3	Malignant neoplasm of hepatic flexure	41,9				MLH1	c.1937A>G	p.Y646C								3.69
Amsterdam-II	112	112-1	yes (positive)			C18.4	Malignant neoplasm of transverse colon	65,6	MSS	0%	0%	MLH1	c.1937A>G	p.Y646C
Amsterdam-II	112	112-1	yes (positive)			C64	Malignant neoplasm of urinary tract	49,9				MLH1	c.1937A>G	p.Y646C
Amsterdam-II	112	112-2	no			C18.9	Malignant neoplasm of colon, unspecified	unknown				MLH1	c.1937A>G	p.Y646C
Amsterdam-II	112	112-3	no			C96.7	Other specified malignant neoplasms of lymphoid, haematopoietic and related tissue	69,5				MLH1	c.1937A>G	p.Y646C
Amsterdam-II	112	112-4	no			C18.4	Malignant neoplasm of transverse colon	64,5				MLH1	c.1937A>G	p.Y646C
Amsterdam-II	112	112-4	no			C54.9	Malignant neoplasm of corpus uteri, unspecified	66,5				MLH1	c.1937A>G	p.Y646C
Amsterdam-II	112	112-5	no			C18.9	Malignant neoplasm of colon, unspecified	unknown				MLH1	c.1937A>G	p.Y646C
Amsterdam-II	112	112-6	no			C18.7	Malignant neoplasm of sigmoid colon	38,5				MLH1	c.1937A>G	p.Y646C
Amsterdam-II	112	112-6	no			C20	Malignant neoplasm of rectum	41,5				MLH1	c.1937A>G	p.Y646C
Amsterdam-II	112	112-6	no			C56	Malignant neoplasm of ovary	41,5				MLH1	c.1937A>G	p.Y646C
Bethesda	123	123-1	yes (positive)			C18.2	Malignant neoplasm of ascending colon	44,8	MSI-H	0%		MLH1	c.1943C>T	p.P648L	32	0	reduced	64		0	3.103	6.8	[18]	[22]		[22]			[18]
Bethesda	123	123-2	no			C18.9	Malignant neoplasm of colon, unspecified	74,5				MLH1	c.1943C>T	p.P648L
Bethesda	123	123-3	no			C18.9	Malignant neoplasm of colon, unspecified	42,5				MLH1	c.1943C>T	p.P648L
Bethesda	123	123-4	yes (positive)			C18.5	Malignant neoplasm of splenic flexure	43,4				MLH1	c.1943C>T	p.P648L
Bethesda	124	124-1	yes (positive)			C62.9	Malignant neoplasm of testis, unspecified	35				MLH1	c.1942C>T	p.P648S	10	0	reduced	2		0.01	2.889	6.2	[18]						[18]
Bethesda	124	124-2	no			C67	Malignant neoplasm of bladder	37,5				MLH1	c.1942C>T	p.P648S
Bethesda	124	124-3	yes (positive)			C18.2	Malignant neoplasm of ascending colon	46,5	MSI-H	0%		MLH1	c.1942C>T	p.P648S
Bethesda	124	124-3	yes (positive)			C18.2	Malignant neoplasm of ascending colon	46,5				MLH1	c.1942C>T	p.P648S
Bethesda	124	124-4	no			C61	Malignant neoplasm of prostate	80,5				MLH1	c.1942C>T	p.P648S
Bethesda	124	124-4	no			C67	Malignant neoplasm of bladder	79,8				MLH1	c.1942C>T	p.P648S
Bethesda	124	124-5	no			C18.9	Malignant neoplasm of colon, unspecified	51				MLH1	c.1942C>T	p.P648S
Bethesda	124	124-5	no			C20	Malignant neoplasm of rectum	50				MLH1	c.1942C>T	p.P648S
Bethesda	125	125-1	yes (positive)			C18.2	Malignant neoplasm of ascending colon	38	MSI-H	0%		MLH1	c.1961C>T	p.P654L	0	0	reduced	8	normal splicing [40]	0	3.34	19.2	[18]	[22]		[22]			[18]
Bethesda	125	125-2	no			C53.0	Malignant neoplasm of endocervix	41,5				MLH1	c.1961C>T	p.P654L
Bethesda	125	125-3	no			C18.9	Malignant neoplasm of colon, unspecified	< 58,2				MLH1	c.1961C>T	p.P654L
Amsterdam-II	126	126-1	no			C18.4	Malignant neoplasm of transverse colon	49,4	MSI-H	>0-1%	0%	MLH1	c.1961C>T	p.P654L
Amsterdam-II	126	126-2	no			C16	Malignant neoplasm of stomach	unknown				MLH1	c.1961C>T	p.P654L
Amsterdam-II	126	126-2	no			C18.9	Malignant neoplasm of colon, unspecified	73,5				MLH1	c.1961C>T	p.P654L
Amsterdam-II	126	126-3	no			C16	Malignant neoplasm of stomach	unknown				MLH1	c.1961C>T	p.P654L
Amsterdam-II	126	126-3	no			C18.9	Malignant neoplasm of colon, unspecified	unknown				MLH1	c.1961C>T	p.P654L
Amsterdam-II	126	126-4	no			C18.9	Malignant neoplasm of colon, unspecified	unknown				MLH1	c.1961C>T	p.P654L
Amsterdam-II	126	126-5	no			C18.9	Malignant neoplasm of colon, unspecified	unknown				MLH1	c.1961C>T	p.P654L
Amsterdam-II	126	126-6	no			C18.9	Malignant neoplasm of colon, unspecified	unknown				MLH1	c.1961C>T	p.P654L
Amsterdam-II	126	126-7	no			C80	Malignant neoplasms of ill-defined, secondary and unspecified sites	unknown				MLH1	c.1961C>T	p.P654L
Amsterdam-II	126	126-8	yes (positive)			C18.5	Malignant neoplasm of splenic flexure	44,5				MLH1	c.1961C>T	p.P654L
Amsterdam-II	126	126-9	no			C18.9	Malignant neoplasm of colon, unspecified	43,5				MLH1	c.1961C>T	p.P654L
Amsterdam-II	127	127-1	yes (positive)			C18.9	Malignant neoplasm of colon, unspecified	42,5				MLH1	c.1961C>T	p.P654L
Amsterdam-II	127	127-2	yes (positive)			C18.9	Malignant neoplasm of colon, unspecified	32,5				MLH1	c.1961C>T	p.P654L
Amsterdam-II	127	127-3	no			C18.9	Malignant neoplasm of colon, unspecified	< 69,2				MLH1	c.1961C>T	p.P654L
Amsterdam-II	127	127-4	no			C18.9	Malignant neoplasm of colon, unspecified	36,5				MLH1	c.1961C>T	p.P654L
Amsterdam-II	127	127-5	no			C18.9	Malignant neoplasm of colon, unspecified	80,5				MLH1	c.1961C>T	p.P654L
Amsterdam-II	127	127-6	no			C18.9	Malignant neoplasm of colon, unspecified	34,5				MLH1	c.1961C>T	p.P654L
Amsterdam-II	127	127-7	no			C94.7	Other specified leukaemias	6,5				MLH1	c.1961C>T	p.P654L
Amsterdam-II	127	127-8	yes (positive)			C54.1	Malignant neoplasm of endometrium	38				MLH1	c.1961C>T	p.P654L
Bethesda	128	128-1	yes (positive)			C18.7	Malignant neoplasm of sigmoid colon	36,7	MSI-H	0%		MLH1	c.1961C>T	p.P654L
Bethesda	128	128-2	no			C18.9	Malignant neoplasm of colon, unspecified	65,5				MLH1	c.1961C>T	p.P654L
Bethesda	128	128-2	no			C32	Malignant neoplasm of larynx	56,5				MLH1	c.1961C>T	p.P654L
Bethesda	128	128-3	no			C18.9	Malignant neoplasm of colon, unspecified	60,5				MLH1	c.1961C>T	p.P654L
Bethesda	128	128-4	no			C80	Malignant neoplasms of ill-defined, secondary and unspecified sites	40,5				MLH1	c.1961C>T	p.P654L
Amsterdam-II	129	129-1	yes (positive)			C18.4	Malignant neoplasm of transverse colon	41	MSI-H	0%		MLH1	c.1961C>T	p.P654L
Amsterdam-II	129	129-2	no			C18.9	Malignant neoplasm of colon, unspecified	66,5				MLH1	c.1961C>T	p.P654L
Amsterdam-II	129	129-2	no			C73	Malignant neoplasms of thyroid and other endocrine glands	54,5				MLH1	c.1961C>T	p.P654L
Amsterdam-II	129	129-3	no			C18.9	Malignant neoplasm of colon, unspecified	67,5				MLH1	c.1961C>T	p.P654L
Amsterdam-II	129	129-4	no			C18.9	Malignant neoplasm of colon, unspecified	45,5				MLH1	c.1961C>T	p.P654L
Amsterdam-II	129	129-5	no			C18.9	Malignant neoplasm of colon, unspecified	85,5				MLH1	c.1961C>T	p.P654L
Amsterdam-II	129	129-6	no			C64	Malignant neoplasm of urinary tract	50,5				MLH1	c.1961C>T	p.P654L
Amsterdam-II	130	130-1	yes (positive)			C18.7	Malignant neoplasm of sigmoid colon	42,5	MSI-H	0%		MLH1	c.1961C>T	p.P654L
Amsterdam-II	130	130-2	no			C18.9	Malignant neoplasm of colon, unspecified	46,5				MLH1	c.1961C>T	p.P654L
Amsterdam-II	130	130-3	no			C18.9	Malignant neoplasm of colon, unspecified	51,5				MLH1	c.1961C>T	p.P654L
Amsterdam-II	130	130-3	no			C18.9	Malignant neoplasm of colon, unspecified	56,5				MLH1	c.1961C>T	p.P654L
Amsterdam-II	130	130-3	no			C18.9	Malignant neoplasm of colon, unspecified	41,5				MLH1	c.1961C>T	p.P654L
Amsterdam-II	130	130-3	no			C25	Malignant neoplasm of pancreas	65,5				MLH1	c.1961C>T	p.P654L
Amsterdam-II	130	130-4	no			C18.9	Malignant neoplasm of colon, unspecified	61,5				MLH1	c.1961C>T	p.P654L
Amsterdam-II	131	131-1	no			C18.9	Malignant neoplasm of colon, unspecified	unknown				MLH1	c.1961C>T	p.P654L
Amsterdam-II	131	131-2	no			C18.9	Malignant neoplasm of colon, unspecified	unknown				MLH1	c.1961C>T	p.P654L
Amsterdam-II	131	131-3	no			C18.9	Malignant neoplasm of colon, unspecified	unknown				MLH1	c.1961C>T	p.P654L
Amsterdam-II	131	131-3	no			C25.9	Malignant neoplasm of pancreas, unspecified	unknown				MLH1	c.1961C>T	p.P654L
Amsterdam-II	131	131-4	no			C18.9	Malignant neoplasm of colon, unspecified	unknown				MLH1	c.1961C>T	p.P654L
Amsterdam-II	131	131-5	no			C18.9	Malignant neoplasm of colon, unspecified	unknown				MLH1	c.1961C>T	p.P654L
Amsterdam-II	131	131-5	no			C25.9	Malignant neoplasm of pancreas, unspecified	unknown				MLH1	c.1961C>T	p.P654L
Amsterdam-II	131	131-6	no			C18.9	Malignant neoplasm of colon, unspecified	unknown				MLH1	c.1961C>T	p.P654L
Amsterdam-II	131	131-6	no			C54.1	Malignant neoplasm of endometrium	unknown				MLH1	c.1961C>T	p.P654L
Amsterdam-II	131	131-7	no			C18.9	Malignant neoplasm of colon, unspecified	unknown				MLH1	c.1961C>T	p.P654L
Amsterdam-II	131	131-7	no			C54.1	Malignant neoplasm of endometrium	unknown				MLH1	c.1961C>T	p.P654L
Amsterdam-II	131	131-8	no			C18.9	Malignant neoplasm of colon, unspecified	unknown				MLH1	c.1961C>T	p.P654L
Amsterdam-II	131	131-9	no			C80	Malignant neoplasms of ill-defined, secondary and unspecified sites	unknown				MLH1	c.1961C>T	p.P654L
Amsterdam-II	131	131-10	no			C80	Malignant neoplasms of ill-defined, secondary and unspecified sites	unknown				MLH1	c.1961C>T	p.P654L
Amsterdam-II	131	131-11	yes (positive)			C18.0	Malignant neoplasm of caecum	51,7				MLH1	c.1961C>T	p.P654L
Amsterdam-II	131	131-11	yes (positive)			C18.2	Malignant neoplasm of ascending colon	51,7	MSI-H			MLH1	c.1961C>T	p.P654L
Amsterdam-II	131	131-12	yes (positive)			C18.3	Malignant neoplasm of hepatic flexure	58,2				MLH1	c.1961C>T	p.P654L
Amsterdam-II	131	131-12	yes (positive)			C54.1	Malignant neoplasm of endometrium	26,1				MLH1	c.1961C>T	p.P654L
Amsterdam-II	131	131-13	no			C16.9	Malignant neoplasm of malignant neoplasm of stomach, unspecified	45,5				MLH1	c.1961C>T	p.P654L
Amsterdam-II	131	131-13	no			C18.9	Malignant neoplasm of colon, unspecified	unknown				MLH1	c.1961C>T	p.P654L
Amsterdam-II	131	131-14	no			C16.9	Malignant neoplasm of malignant neoplasm of stomach, unspecified	unknown				MLH1	c.1961C>T	p.P654L
Amsterdam-II	131	131-14	no			C18.9	Malignant neoplasm of colon, unspecified	unknown				MLH1	c.1961C>T	p.P654L
Amsterdam-II	131	131-15	no			C18.9	Malignant neoplasm of colon, unspecified	unknown				MLH1	c.1961C>T	p.P654L
Amsterdam-II	131	131-16	no			C56	Malignant neoplasm of ovary	36,6	MSI-H	0%		MLH1	c.1961C>T	p.P654L
Amsterdam-II	131	131-17	no			C25.9	Malignant neoplasm of pancreas, unspecified	unknown				MLH1	c.1961C>T	p.P654L
Amsterdam-II	131	131-18	no			C18.9	Malignant neoplasm of colon, unspecified	unknown				MLH1	c.1961C>T	p.P654L
Amsterdam-II	132	132-1	no			C18.9	Malignant neoplasm of colon, unspecified	unknown				MLH1	c.1961C>T	p.P654L
Amsterdam-II	132	132-2	no			C18.9	Malignant neoplasm of colon, unspecified	unknown				MLH1	c.1961C>T	p.P654L
Amsterdam-II	132	132-3	no			C18.9	Malignant neoplasm of colon, unspecified	60,5				MLH1	c.1961C>T	p.P654L
Amsterdam-II	132	132-4	yes (positive)			C18.3	Malignant neoplasm of hepatic flexure	53,1				MLH1	c.1961C>T	p.P654L
Amsterdam-II	132	132-4	yes (positive)			C18.7	Malignant neoplasm of sigmoid colon	41,1				MLH1	c.1961C>T	p.P654L
Amsterdam-II	132	132-4	yes (positive)			C25.0	Malignant neoplasm of head of pancreas	67,1	MSI-H	0%		MLH1	c.1961C>T	p.P654L
Amsterdam-II	132	132-4	yes (positive)			C51	Malignant neoplasms of female genital organs	63,8				MLH1	c.1961C>T	p.P654L
Amsterdam-II	132	132-4	yes (positive)			C54.1	Malignant neoplasm of endometrium	44,5				MLH1	c.1961C>T	p.P654L
Amsterdam-II	132	132-5	no			C18.9	Malignant neoplasm of colon, unspecified	40,5				MLH1	c.1961C>T	p.P654L
Amsterdam-II	132	132-6	no			C18.4	Malignant neoplasm of transverse colon	44,5				MLH1	c.1961C>T	p.P654L
Amsterdam-II	132	132-7	no			C18.9	Malignant neoplasm of colon, unspecified	42,5				MLH1	c.1961C>T	p.P654L
Amsterdam-II	132	132-7	no			C64	Malignant neoplasm of urinary tract	43,5				MLH1	c.1961C>T	p.P654L
Amsterdam-II	132	132-8	no			C56	Malignant neoplasm of ovary	< 44,2				MLH1	c.1961C>T	p.P654L
Amsterdam-II	133	133-1	yes (positive)			C18.2	Malignant neoplasm of ascending colon	27,1	MSI-H			MLH1	c.1961C>T	p.P654L
Amsterdam-II	133	133-2	no			C34	Malignant neoplasm of bronchus and lung	unknown				MLH1	c.1961C>T	p.P654L
Amsterdam-II	133	133-3	no			C18.7	Malignant neoplasm of sigmoid colon	49,5				MLH1	c.1961C>T	p.P654L
Amsterdam-II	133	133-4	no			C18.9	Malignant neoplasm of colon, unspecified	42,5				MLH1	c.1961C>T	p.P654L
Amsterdam-II	133	133-4	no			C18.2	Malignant neoplasm of ascending colon	38,5				MLH1	c.1961C>T	p.P654L
Amsterdam-II	133	133-4	no			C20	Malignant neoplasm of rectum	66,5				MLH1	c.1961C>T	p.P654L
Amsterdam-II	133	133-5	no			C07	Malignant neoplasm of parotid gland	unknown				MLH1	c.1961C>T	p.P654L
Amsterdam-II	133	133-6	no			C18.9	Malignant neoplasm of colon, unspecified	unknown				MLH1	c.1961C>T	p.P654L
Amsterdam-II	133	133-7	no			C18.9	Malignant neoplasm of colon, unspecified	unknown				MLH1	c.1961C>T	p.P654L
Amsterdam-II	133	133-8	no			C18.9	Malignant neoplasm of colon, unspecified	unknown				MLH1	c.1961C>T	p.P654L
Amsterdam-II	133	133-9	no			C18.9	Malignant neoplasm of colon, unspecified	unknown				MLH1	c.1961C>T	p.P654L
Amsterdam-II	133	133-10	no			C18.9	Malignant neoplasm of colon, unspecified	38,5				MLH1	c.1961C>T	p.P654L
Amsterdam-II	133	133-11	no			C80	Malignant neoplasms of ill-defined, secondary and unspecified sites	50,5				MLH1	c.1961C>T	p.P654L
Amsterdam-II	133	133-12	no			C22.7	Other specified carcinomas of liver	unknown				MLH1	c.1961C>T	p.P654L
Amsterdam-II	133	133-13	no			C55	Malignant neoplasm of uterus, part unspecified	unknown				MLH1	c.1961C>T	p.P654L
Amsterdam-II	133	133-14	no			C18.9	Malignant neoplasm of colon, unspecified	unknown				MLH1	c.1961C>T	p.P654L
Amsterdam-II	133	133-15	no			C18.9	Malignant neoplasm of colon, unspecified	unknown				MLH1	c.1961C>T	p.P654L
Amsterdam-II	134	134-1	yes (positive)			C18.4	Malignant neoplasm of transverse colon	43,3	MSI-H	0%		MLH1	c.1961C>T	p.P654L
Amsterdam-II	134	134-2	no			C18.9	Malignant neoplasm of colon, unspecified	33,5				MLH1	c.1961C>T	p.P654L
Amsterdam-II	134	134-3	yes (positive)			C54.1	Malignant neoplasm of endometrium	51				MLH1	c.1961C>T	p.P654L
Amsterdam-II	135	135-1	yes (positive)			C18.0	Malignant neoplasm of caecum	47,9	MSI-H	0%		MLH1	c.1961C>T	p.P654L
Amsterdam-II	135	135-2	no			C18.9	Malignant neoplasm of colon, unspecified	38,5				MLH1	c.1961C>T	p.P654L
Amsterdam-II	135	135-2	no			C72.9	Malignant neoplasm of central nervous system, unspecified	55,5				MLH1	c.1961C>T	p.P654L
Amsterdam-II	135	135-3	no			C18.9	Malignant neoplasm of colon, unspecified	65,5				MLH1	c.1961C>T	p.P654L
Amsterdam-II	135	135-3	no			C61	Malignant neoplasm of prostate	unknown				MLH1	c.1961C>T	p.P654L
Amsterdam-II	135	135-4	yes (negative)			C55	Malignant neoplasm of uterus, part unspecified	34,7				MLH1	c.1961C>T	p.P654L
Bethesda	136	136-1	yes (positive)			C18.2	Malignant neoplasm of ascending colon	38,5	MSI-H	0%		MLH1	c.1984A>C	p.T662P								3,33 bord	[21, 22]			[22]
Bethesda	136	136-2	no			C18.9	Malignant neoplasm of colon, unspecified	56,5				MLH1	c.1984A>C	p.T662P
Bethesda	136	136-3	no			C55	Malignant neoplasm of uterus, part unspecified	38,5				MLH1	c.1984A>C	p.T662P
Bethesda	136	136-4	no			C71	Malignant neoplasm of brain	45,5				MLH1	c.1984A>C	p.T662P
Bethesda	137	137-1	yes (positive)			C18.4	Malignant neoplasm of transverse colon	35,8	MSI-H	0%	0%	MLH1	c.1984A>C	p.T662P
Bethesda	137	137-2	no			C34	Malignant neoplasm of bronchus and lung	unknown				MLH1	c.1984A>C	p.T662P
Bethesda	138	138-1	yes (positive)				Carcinoma	unknown				MLH1	c.1984A>C	p.T662P
Bethesda	138	138-2	no			C18.9	Malignant neoplasm of colon, unspecified	37,5				MLH1	c.1984A>C	p.T662P
Bethesda	138	138-3	no			C18.9	Malignant neoplasm of colon, unspecified	36,5				MLH1	c.1984A>C	p.T662P
Bethesda	139	139-1	yes (positive)	MLH1		C18.2	Malignant neoplasm of ascending colon	33,1				MLH1	c.1984A>C	p.T662P
Bethesda	139	139-1	yes (positive)	MLH1		C18.4	Malignant neoplasm of transverse colon	47,1				MLH1	c.1984A>C	p.T662P
Bethesda	139	139-1	yes (positive)	MLH1		C18.6	Malignant neoplasm of descending colon	60,1	MSI-H	0%	0%	MLH1	c.1984A>C	p.T662P
Bethesda	139	139-2	no			C18.9	Malignant neoplasm of colon, unspecified	unknown				MLH1	c.1984A>C	p.T662P
Bethesda	140	140-1	yes (positive)			C18.2	Malignant neoplasm of ascending colon	56,5	MSI-H	0%	0%	MLH1	c.1984A>C	p.T662P
Bethesda	140	140-2	no			C18.9	Malignant neoplasm of colon, unspecified	28,5				MLH1	c.1984A>C	p.T662P
Amsterdam-II	141	141-1	yes (positive)			C50.9	Malignant neoplasm of breast, unspecified	50,6		>10%/positive		MLH1	c.1984A>C	p.T662P
Amsterdam-II	141	141-1	yes (positive)			C50.9	Malignant neoplasm of breast, unspecified	56,6				MLH1	c.1984A>C	p.T662P
Amsterdam-II	141	141-1	yes (positive)			C50.9	Malignant neoplasm of breast, unspecified	54,6				MLH1	c.1984A>C	p.T662P
Amsterdam-II	141	141-1	yes (positive)			C50.9	Malignant neoplasm of breast, unspecified	52,6				MLH1	c.1984A>C	p.T662P
Amsterdam-II	141	141-2	no			C18.9	Malignant neoplasm of colon, unspecified	79,5				MLH1	c.1984A>C	p.T662P
Amsterdam-II	141	141-3	no			C55	Malignant neoplasm of uterus, part unspecified	54,5				MLH1	c.1984A>C	p.T662P
Amsterdam-II	141	141-4	no			C18.9	Malignant neoplasm of colon, unspecified	40,5				MLH1	c.1984A>C	p.T662P
Amsterdam-II	141	141-5	no			C18.9	Malignant neoplasm of colon, unspecified	50,5				MLH1	c.1984A>C	p.T662P
Amsterdam-II	141	141-6	no			C50.9	Malignant neoplasm of breast, unspecified	63,5				MLH1	c.1984A>C	p.T662P
Bethesda	142	142-1	yes (positive)	MLH1		C18.0	Malignant neoplasm of caecum	63,4		0%	0%	MLH1	c.1989G>T	p.E663D					aberrant splicing [35, 39]			2.54
Bethesda	142	142-1	yes (positive)	MLH1		C18.4	Malignant neoplasm of transverse colon	57,5				MLH1	c.1989G>T	p.E663D
Bethesda	142	142-1	yes (positive)	MLH1		C18.4	Malignant neoplasm of transverse colon	57,5		0%	0%	MLH1	c.1989G>T	p.E663D
Bethesda	142	142-1	yes (positive)	MLH1		C18.7	Malignant neoplasm of sigmoid colon	50,1				MLH1	c.1989G>T	p.E663D
Amsterdam-II	143	143-1	no			C16	Malignant neoplasm of stomach	30,5				MLH1	c.2027T>C	p.L676P	3	0	reduced	39	normal splicing [40]	0	1.74	17.7
Amsterdam-II	143	143-1	no			C18.9	Malignant neoplasm of colon, unspecified	30,5				MLH1	c.2027T>C	p.L676P
Amsterdam-II	143	143-2	no			C18.9	Malignant neoplasm of colon, unspecified	unknown				MLH1	c.2027T>C	p.L676P
Amsterdam-II	143	143-3	yes (positive)			C17.0	Malignant neoplasm of duodenum	37,7				MLH1	c.2027T>C	p.L676P
Amsterdam-II	143	143-3	yes (positive)			C18.9	Malignant neoplasm of colon, unspecified	41,4				MLH1	c.2027T>C	p.L676P
Amsterdam-II	143	143-3	yes (positive)			C18.9	Malignant neoplasm of colon, unspecified	45,5				MLH1	c.2027T>C	p.L676P
Amsterdam-II	143	143-3	yes (positive)			C18.0	Malignant neoplasm of caecum	45,5				MLH1	c.2027T>C	p.L676P
Amsterdam-II	143	143-3	yes (positive)			C18.0	Malignant neoplasm of caecum	33,3				MLH1	c.2027T>C	p.L676P
Amsterdam-II	143	143-3	yes (positive)			C54.1	Malignant neoplasm of endometrium	39,6				MLH1	c.2027T>C	p.L676P
Amsterdam-II	143	143-4	no			C41.9	Malignant neoplasms of lymphoid, haematopoietic and related tissue, unspecified	21,5				MLH1	c.2027T>C	p.L676P
Amsterdam-II	143	143-5	no			C18.2	Malignant neoplasm of ascending colon	32,9	MSI-H	>0-1%		MLH1	c.2027T>C	p.L676P
Bethesda	144	144-1	yes (positive)			C20	Malignant neoplasm of rectum	42				MLH1	c.2030G>A	p.S677N								10.19
Bethesda	145	145-1	yes (positive)			C20	Malignant neoplasm of rectum	38	MSI-H	0%		MLH1	c.2041G>A	p.A681T	28	0	reduced	41	normal splicing [40]	0	1.774	4.4	[18, 22]			[16, 22]		[6]	[18]
Bethesda	146	146-1	yes (positive)			C18.4	Malignant neoplasm of transverse colon	45		>0-1%		MLH1	c.2041G>A	p.A681T
Bethesda	146	146-2	no			C18.9	Malignant neoplasm of colon, unspecified	62,5				MLH1	c.2041G>A	p.A681T
Bethesda	146	146-3	no			C80	Malignant neoplasms of ill-defined, secondary and unspecified sites	unknown				MLH1	c.2041G>A	p.A681T
Bethesda	146	146-4	no			C50	Malignant neoplasm of breast	unknown				MLH1	c.2041G>A	p.A681T
Bethesda	146	146-5	no			C67	Malignant neoplasm of bladder	unknown				MLH1	c.2041G>A	p.A681T
Bethesda	146	146-6	no			C80	Malignant neoplasms of ill-defined, secondary and unspecified sites	unknown				MLH1	c.2041G>A	p.A681T
Amsterdam-II	147	147-1	yes (positive)			C18.4	Malignant neoplasm of transverse colon	33	MSI-H	0%	0%	MLH1	c.2041G>A	p.A681T
Amsterdam-II	147	147-2	no			C62	Malignant neoplasm of testis	35,5				MLH1	c.2041G>A	p.A681T
Amsterdam-II	147	147-3	no			C18.9	Malignant neoplasm of colon, unspecified	43,5				MLH1	c.2041G>A	p.A681T
Amsterdam-II	147	147-4	no			C18.9	Malignant neoplasm of colon, unspecified	68,5				MLH1	c.2041G>A	p.A681T
Amsterdam-II	147	147-5	no			C80	Malignant neoplasms of ill-defined, secondary and unspecified sites	< 77				MLH1	c.2041G>A	p.A681T
Amsterdam-II	147	147-6	no			C18.9	Malignant neoplasm of colon, unspecified	53,5				MLH1	c.2041G>A	p.A681T
Amsterdam-II	147	147-7	no			C80	Malignant neoplasms of ill-defined, secondary and unspecified sites	< 62				MLH1	c.2041G>A	p.A681T
Amsterdam-II	147	147-8	no			C80	Malignant neoplasms of ill-defined, secondary and unspecified sites	< 37				MLH1	c.2041G>A	p.A681T
Amsterdam-II	147	147-9	no			C80	Malignant neoplasms of ill-defined, secondary and unspecified sites	< 69,2				MLH1	c.2041G>A	p.A681T
Bethesda	148	148-1	yes (positive)			C16.3	Malignant neoplasm of pyloric antrum	70,2	MSS			MLH1	c.2041G>A	p.A681T
Bethesda	148	148-1	yes (positive)			C18.2	Malignant neoplasm of ascending colon	78,5				MLH1	c.2041G>A	p.A681T
Bethesda	148	148-1	yes (positive)			C18.7	Malignant neoplasm of sigmoid colon	72,6	MSI-H	0%	0%	MLH1	c.2041G>A	p.A681T
Bethesda	148	148-1	yes (positive)			C62	Malignant neoplasm of testis	75,2				MLH1	c.2041G>A	p.A681T
Bethesda	148	148-2	no			C18.9	Colorectal carcinoma	unknown				MLH1	c.2041G>A	p.A681T
Bethesda	148	148-3	no			C18.9	Colorectal carcinoma	unknown				MLH1	c.2041G>A	p.A681T
Bethesda	148	148-4	no			C18.9	Colorectal carcinoma	unknown				MLH1	c.2041G>A	p.A681T
Bethesda	148	148-5	no			C34	Malignant neoplasm of bronchus and lung	unknown				MLH1	c.2041G>A	p.A681T
Bethesda	149	149-1	yes (positive)			C18.2	Malignant neoplasm of ascending colon	43,9	MSI-H	0%	0%	MLH1	c.2041G>A	p.A681T
Amsterdam-II	150	150-1	yes (positive)			C18.0	Malignant neoplasm of caecum	46,8				MLH1	c.2041G>A	p.A681T
Amsterdam-II	150	150-1	yes (positive)			C18.3	Malignant neoplasm of hepatic flexure	46,8	MSI-H	0%	0%	MLH1	c.2041G>A	p.A681T
Amsterdam-II	150	150-2	no			C18.9	Malignant neoplasm of colon, unspecified	64,5				MLH1	c.2041G>A	p.A681T
Amsterdam-II	150	150-3	no			C18.9	Malignant neoplasm of colon, unspecified	57,5				MLH1	c.2041G>A	p.A681T
Amsterdam-II	150	150-3	no			C18.9	Malignant neoplasm of colon, unspecified	43,5				MLH1	c.2041G>A	p.A681T
Amsterdam-II	150	150-4	no			C18.9	Malignant neoplasm of colon, unspecified	34,5				MLH1	c.2041G>A	p.A681T
Amsterdam-II	151	151-1	no			C76.0	Malignant neoplasm of head, face and neck	58,5				MLH1	c.2041G>A	p.A681T
Amsterdam-II	151	151-2	no			C18.9	Malignant neoplasm of colon, unspecified	50,5				MLH1	c.2041G>A	p.A681T
Amsterdam-II	151	151-3	no			C18.9	Malignant neoplasm of colon, unspecified	unknown				MLH1	c.2041G>A	p.A681T
Amsterdam-II	151	151-4	no			C18.9	Malignant neoplasm of colon, unspecified	unknown				MLH1	c.2041G>A	p.A681T
Amsterdam-II	151	151-5	no			C18.9	Malignant neoplasm of colon, unspecified	63,5				MLH1	c.2041G>A	p.A681T
Amsterdam-II	151	151-6	yes (positive)			C18.2	Malignant neoplasm of ascending colon	42,5	MSI-H	0%		MLH1	c.2041G>A	p.A681T
Amsterdam-II	152	152-1	yes (positive)	MSH2		C18.4	Malignant neoplasm of transverse colon	47,4	MSI-H			MLH1	c.2041G>A	p.A681T
Amsterdam-II	152	152-2	no			C18.9	Malignant neoplasm of colon, unspecified	45,5				MLH1	c.2041G>A	p.A681T
Amsterdam-II	152	152-3	no			C18.9	Malignant neoplasm of colon, unspecified	50,5				MLH1	c.2041G>A	p.A681T
Amsterdam-II	152	152-4	no			C18.9	Malignant neoplasm of colon, unspecified	72,5				MLH1	c.2041G>A	p.A681T
Amsterdam-II	152	152-5	no			C18.9	Malignant neoplasm of colon, unspecified	49,5				MLH1	c.2041G>A	p.A681T
Amsterdam-II	152	152-6	no			C18.9	Malignant neoplasm of colon, unspecified	59,5				MLH1	c.2041G>A	p.A681T
Amsterdam-II	152	152-7	no			C18.9	Malignant neoplasm of colon, unspecified	49,5				MLH1	c.2041G>A	p.A681T
Amsterdam-II	153	153-1	yes (positive)			C18.0	Malignant neoplasm of caecum	50,8	MSI-H	0%		MLH1	c.2041G>A	p.A681T
Amsterdam-II	153	153-1	yes (positive)			C18.4	Malignant neoplasm of transverse colon	50,8				MLH1	c.2041G>A	p.A681T
Amsterdam-II	153	153-2	no			C18.9	Malignant neoplasm of colon, unspecified	45,5				MLH1	c.2041G>A	p.A681T
Amsterdam-II	153	153-3	no			C18.9	Malignant neoplasm of colon, unspecified	35,5				MLH1	c.2041G>A	p.A681T
Bethesda	154	154-1	yes (positive)			C18.0	Malignant neoplasm of caecum	37,3				MLH1	c.2041G>A	p.A681T
Bethesda	154	154-2	no			C18.9	Malignant neoplasm of colon, unspecified	80,5				MLH1	c.2041G>A	p.A681T
Bethesda	154	154-3	no			C25.9	Malignant neoplasm of pancreas, unspecified	60,7				MLH1	c.2041G>A	p.A681T
Bethesda	154	154-4	no			C43	Melanoma and other malignant neoplasms of skin	43,7				MLH1	c.2041G>A	p.A681T
Amsterdam-II	155	155-1	yes (positive)			C18.0	Malignant neoplasm of caecum	37,5	MSI-H	0%		MLH1	c.2059C>T	p.R687W						0.01	2.16	3.87		[22]		[22]
Amsterdam-II	155	155-2	no			C18.9	Malignant neoplasm of colon, unspecified	70,5				MLH1	c.2059C>T	p.R687W
Amsterdam-II	155	155-3	no			C18.9	Malignant neoplasm of colon, unspecified	57,5				MLH1	c.2059C>T	p.R687W
Amsterdam-II	155	155-4	no			C18.9	Malignant neoplasm of colon, unspecified	55,5				MLH1	c.2059C>T	p.R687W
Amsterdam-II	155	155-5	no			C18.9	Malignant neoplasm of colon, unspecified	57,5				MLH1	c.2059C>T	p.R687W
Amsterdam-II	155	155-6	no			C18.9	Malignant neoplasm of colon, unspecified	44,5				MLH1	c.2059C>T	p.R687W
Bethesda	156	156-1	yes (positive)			C18.4	Malignant neoplasm of transverse colon	36,8		0%		MLH1	c.2059C>T	p.R687W
Bethesda	156	156-2	yes (positive)			C43	Melanoma and other malignant neoplasms of skin	60,5				MLH1	c.2059C>T	p.R687W
Bethesda	156	156-3	no			C50	Malignant neoplasm of breast	unknown				MLH1	c.2059C>T	p.R687W
Amsterdam-II	157	157-1	yes (positive)	MLH1		C18.6	Malignant neoplasm of descending colon	37,5	MSI-H	0%		MLH1	c.2059C>T	p.R687W
Amsterdam-II	157	157-2	no			C34.9	Malignant neoplasm of bronchus or lung, unspecified	65,5				MLH1	c.2059C>T	p.R687W
Amsterdam-II	157	157-3	no			C18.9	Malignant neoplasm of colon, unspecified	55,5				MLH1	c.2059C>T	p.R687W
Amsterdam-II	157	157-4	no			C18.9	Malignant neoplasm of colon, unspecified	65,5				MLH1	c.2059C>T	p.R687W
Amsterdam-II	157	157-5	no			C18.9	Malignant neoplasm of colon, unspecified	11,5				MLH1	c.2059C>T	p.R687W
Amsterdam-II	157	157-6	no			C18.9	Malignant neoplasm of colon, unspecified	10,5				MLH1	c.2059C>T	p.R687W
Amsterdam-II	157	157-7	no			C34.9	Malignant neoplasm of bronchus or lung, unspecified	70,5				MLH1	c.2059C>T	p.R687W
Amsterdam-II	157	157-8	no			C18.9	Malignant neoplasm of colon, unspecified	37,5				MLH1	c.2059C>T	p.R687W
Bethesda	158	158-1	yes (positive)			C20	Malignant neoplasm of rectum	41,8	MSS	>10%/positive	>10%/positive	MLH1	c.2066A>G	p.Q689R	64	90	like wt	7		0.53	1.16	3.36	[22]		[22]
keins	159	159-1	yes (positive)			C25.0	Malignant neoplasm of head of pancreas	51,1	MSS	>10%/positive		MLH1	c.2066A>G	p.Q689R
Amsterdam-II	160	160-1	yes (positive)			C18.2	Malignant neoplasm of ascending colon	30				MLH1	c.2103G>C	p.Q701H					aberrant splicing [37, 38]			not available
Amsterdam-II	160	160-1	yes (positive)			C18.3	Malignant neoplasm of hepatic flexure	51	MSI-H	0%		MLH1	c.2103G>C	p.Q701H
Amsterdam-II	160	160-2	yes (positive)			C18.9	Malignant neoplasm of colon, unspecified	63,6				MLH1	c.2103G>C	p.Q701H
Amsterdam-II	160	160-3	no			C18.9	Malignant neoplasm of colon, unspecified	unknown				MLH1	c.2103G>C	p.Q701H
Amsterdam-II	160	160-4	no			C18.9	Malignant neoplasm of colon, unspecified	unknown				MLH1	c.2103G>C	p.Q701H
Amsterdam-II	160	160-5	no			C18.9	Malignant neoplasm of colon, unspecified	unknown				MLH1	c.2103G>C	p.Q701H
Amsterdam-II	160	160-6	no			C18.9	Malignant neoplasm of colon, unspecified	unknown				MLH1	c.2103G>C	p.Q701H
Amsterdam-II	161	161-1	yes (positive)			C17.0	Malignant neoplasm of duodenum	34,4				MLH1	c.2103G>C	p.Q701H
Amsterdam-II	161	161-1	yes (positive)			C18.5	Malignant neoplasm of splenic flexure	23,4				MLH1	c.2103G>C	p.Q701H
Amsterdam-II	161	161-1	yes (positive)			C18.8	Malignant neoplasm of overlapping lesion of colon	53,2	MSI-H	0%		MLH1	c.2103G>C	p.Q701H
Amsterdam-II	161	161-2	no			C18.9	Malignant neoplasm of colon, unspecified	74,5				MLH1	c.2103G>C	p.Q701H
Amsterdam-II	161	161-3	no			C18.9	Malignant neoplasm of colon, unspecified	unknown				MLH1	c.2103G>C	p.Q701H
Amsterdam-II	161	161-4	no			C18.9	Malignant neoplasm of colon, unspecified	60,5				MLH1	c.2103G>C	p.Q701H
Amsterdam-II	161	161-5	no			C18.9	Malignant neoplasm of colon, unspecified	60,5				MLH1	c.2103G>C	p.Q701H
Amsterdam-II	161	161-6	no			C34.9	Malignant neoplasm of bronchus or lung, unspecified	unknown				MLH1	c.2103G>C	p.Q701H
Amsterdam-II	161	161-7	no			C34	Malignant neoplasm of bronchus and lung	unknown				MLH1	c.2103G>C	p.Q701H
Amsterdam-II	161	161-8	no			C18.9	Malignant neoplasm of colon, unspecified	28,5				MLH1	c.2103G>C	p.Q701H
Amsterdam-II	162	162-1	yes (positive)			C18.5	Malignant neoplasm of splenic flexure	39,1	MSI-H	>0-1%		MLH1	c.2103G>C	p.Q701H
Amsterdam-II	162	162-1	yes (positive)			C18.5	Malignant neoplasm of splenic flexure	39,1				MLH1	c.2103G>C	p.Q701H
Amsterdam-II	162	162-2	no			C18.2	Malignant neoplasm of ascending colon	31,5				MLH1	c.2103G>C	p.Q701H
Amsterdam-II	162	162-3	no			C16.3	Malignant neoplasm of pyloric antrum	71,5				MLH1	c.2103G>C	p.Q701H
Amsterdam-II	162	162-3	no			C53	Malignant neoplasm of cervix uteri	58,5				MLH1	c.2103G>C	p.Q701H
Amsterdam-II	162	162-4	no			C24.0	Malignant neoplasm of extrahepatic bile duct	57,5				MLH1	c.2103G>C	p.Q701H
Amsterdam-II	162	162-5	no			C18.9	Malignant neoplasm of colon, unspecified	66,5				MLH1	c.2103G>C	p.Q701H
Amsterdam-II	162	162-6	no			C50	Malignant neoplasm of breast	< 71				MLH1	c.2103G>C	p.Q701H
Amsterdam-II	162	162-7	no			C16	Malignant neoplasm of stomach	< 58				MLH1	c.2103G>C	p.Q701H
Amsterdam-II	162	162-8	no			C18.9	Malignant neoplasm of colon, unspecified	< 74				MLH1	c.2103G>C	p.Q701H
Amsterdam-II	162	162-9	no			C80	Malignant neoplasms of ill-defined, secondary and unspecified sites	< 52				MLH1	c.2103G>C	p.Q701H
Amsterdam-II	163	163-1	yes (positive)			C24.0	Malignant neoplasm of extrahepatic bile duct	54,6	MSI-H			MLH1	c.2103G>C	p.Q701H
Amsterdam-II	163	163-1	yes (positive)			C54.1	Malignant neoplasm of endometrium	55,3			0%	MLH1	c.2103G>C	p.Q701H
Amsterdam-II	163	163-2	no			C18.9	Malignant neoplasm of colon, unspecified	65,5				MLH1	c.2103G>C	p.Q701H
Amsterdam-II	163	163-3	no			C18.9	Malignant neoplasm of colon, unspecified	45,5				MLH1	c.2103G>C	p.Q701H
Amsterdam-II	163	163-3	no			C55	Malignant neoplasm of uterus, part unspecified	45,5				MLH1	c.2103G>C	p.Q701H
Amsterdam-II	163	163-4	no			C50.9	Malignant neoplasm of breast, unspecified	60,5				MLH1	c.2103G>C	p.Q701H
Bethesda	164	164-1	yes (positive)			C20	Malignant neoplasm of rectum	30		0%	0%	MLH1	c.2103G>C	p.Q701H
Bethesda	164	164-2	no			C80	Malignant neoplasms of ill-defined, secondary and unspecified sites	35,5				MLH1	c.2103G>C	p.Q701H
Bethesda	164	164-3	no			C16	Malignant neoplasm of stomach	65,5				MLH1	c.2103G>C	p.Q701H
Bethesda	164	164-4	no			C18.9	Malignant neoplasm of colon, unspecified	30,5				MLH1	c.2103G>C	p.Q701H
Bethesda	164	164-5	no			C53	Malignant neoplasm of cervix uteri	24,5				MLH1	c.2103G>C	p.Q701H
Amsterdam-II	165	165-1	yes (positive)			C17.0	Malignant neoplasm of duodenum	33,6				MLH1	c.2103G>C	p.Q701H
Amsterdam-II	165	165-1	yes (positive)			C18.0	Malignant neoplasm of caecum	53,2				MLH1	c.2103G>C	p.Q701H
Amsterdam-II	165	165-1	yes (positive)			C18.4	Malignant neoplasm of transverse colon	23,4				MLH1	c.2103G>C	p.Q701H
Amsterdam-II	165	165-1	yes (positive)			C18.5	Malignant neoplasm of splenic flexure	23,4				MLH1	c.2103G>C	p.Q701H
Amsterdam-II	165	165-1	yes (positive)			C18.6	Malignant neoplasm of descending colon	53,2				MLH1	c.2103G>C	p.Q701H
Amsterdam-II	165	165-1	yes (positive)			C20	Malignant neoplasm of rectum	53,2				MLH1	c.2103G>C	p.Q701H
Amsterdam-II	165	165-2	no			C18.9	Malignant neoplasm of colon, unspecified	unknown				MLH1	c.2103G>C	p.Q701H
Amsterdam-II	165	165-3	no			C34.9	Malignant neoplasm of bronchus or lung, unspecified	unknown				MLH1	c.2103G>C	p.Q701H
Amsterdam-II	165	165-4	no			C18.9	Malignant neoplasm of colon, unspecified	34,5				MLH1	c.2103G>C	p.Q701H
Amsterdam-II	165	165-5	no			C18.9	Malignant neoplasm of colon, unspecified	57,5				MLH1	c.2103G>C	p.Q701H
Amsterdam-II	165	165-6	no			C34.9	Malignant neoplasm of bronchus or lung, unspecified	unknown				MLH1	c.2103G>C	p.Q701H
Amsterdam-II	165	165-7	no			C41.9	Malignant neoplasms of lymphoid, haematopoietic and related tissue, unspecified	19,5				MLH1	c.2103G>C	p.Q701H
Amsterdam-II	165	165-8	no			C18.9	Malignant neoplasm of colon, unspecified	60,5				MLH1	c.2103G>C	p.Q701H
Amsterdam-II	165	165-9	no			C50.9	Malignant neoplasm of breast, unspecified	34,5				MLH1	c.2103G>C	p.Q701H
Amsterdam-II	166	166-1	no			C18.9	Malignant neoplasm of colon, unspecified	45,5				MLH1	c.2103G>C	p.Q701H
Amsterdam-II	166	166-2	no			C32	Malignant neoplasm of larynx	49,5				MLH1	c.2103G>C	p.Q701H
Amsterdam-II	166	166-3	no			C80	Malignant neoplasms of ill-defined, secondary and unspecified sites	50,5				MLH1	c.2103G>C	p.Q701H
Amsterdam-II	166	166-4	no			C18.9	Malignant neoplasm of colon, unspecified	39,5				MLH1	c.2103G>C	p.Q701H
Amsterdam-II	166	166-5	yes (positive)			C18.7	Malignant neoplasm of sigmoid colon	43	MSI-H	0%		MLH1	c.2103G>C	p.Q701H
Amsterdam-II	167	167-1	yes (positive)			C18.2	Malignant neoplasm of ascending colon	37,9	MSI-H	>0-1%		MLH1	c.2103G>C	p.Q701H
Amsterdam-II	167	167-2	no			C18.9	Malignant neoplasm of colon, unspecified	67,5				MLH1	c.2103G>C	p.Q701H
Amsterdam-II	167	167-3	no			C80	Malignant neoplasms of ill-defined, secondary and unspecified sites	60,5				MLH1	c.2103G>C	p.Q701H
Amsterdam-II	167	167-4	no			C18.9	Malignant neoplasm of colon, unspecified	50,5				MLH1	c.2103G>C	p.Q701H
Amsterdam-II	167	167-5	no			C72.9	Malignant neoplasm of central nervous system, unspecified	37,5				MLH1	c.2103G>C	p.Q701H
Amsterdam-II	167	167-6	yes (positive)			C53.9	Malignant neoplasm of cervix uteri, unspecified	42,9				MLH1	c.2103G>C	p.Q701H
Amsterdam-II	168	168-1	yes (positive)		p.D737V	C18.6	Malignant neoplasm of descending colon	51,4	MSI-H	0%		MLH1	c.2103G>C	p.Q701H								not available
Amsterdam-II	168	168-2	yes (positive)			C16	Malignant neoplasm of stomach	< 55	MSI-H	0%		MLH1	c.2103G>C	p.Q701H
Amsterdam-II	168	168-2	yes (positive)			C18.2	Malignant neoplasm of ascending colon	23,9				MLH1	c.2103G>C	p.Q701H
Amsterdam-II	168	168-2	yes (positive)			C18.4	Malignant neoplasm of transverse colon	54,1				MLH1	c.2103G>C	p.Q701H
Amsterdam-II	168	168-3	no			C18.9	Malignant neoplasm of colon, unspecified	51,5				MLH1	c.2103G>C	p.Q701H
Amsterdam-II	168	168-4	no			C18.9	Malignant neoplasm of colon, unspecified	unknown				MLH1	c.2103G>C	p.Q701H
Amsterdam-II	168	168-5	no			C18.9	Malignant neoplasm of colon, unspecified	unknown				MLH1	c.2103G>C	p.Q701H
Bethesda	169	169-1	yes (positive)	MLH1		C19	Malignant neoplasm of rectosigmoid junction	38,4	MSS	>10%/positive	0%	MLH1	c.2135G>C	p.W712S								3,17 bord
Bethesda	170	170-1	no			C16.8	Malignant neoplasm of overlapping lesion of stomach	73,7	MSS			MLH1	c.2146G>A	p.V716M						0.18	0.62	2.78	[18, 22]		[22]				[18]
Bethesda	170	170-1	no			C18.4	Malignant neoplasm of transverse colon	57,7		>10%/positive	>10%/positive	MLH1	c.2146G>A	p.V716M
Bethesda	170	170-2	yes (positive)	MLH1		C16	Malignant neoplasm of stomach	53,9	MSI-H	>10%/positive	>10%/positive	MLH1	c.2146G>A	p.V716M
Bethesda	170	170-2	yes (positive)	MLH1		C50	Malignant neoplasm of breast	50,5				MLH1	c.2146G>A	p.V716M
Bethesda	170	170-3	no			C26.9	Malignant neoplasm of ill-defined sites within the digestive system	unknown				MLH1	c.2146G>A	p.V716M
Bethesda	170	170-4	no			C26.9	Malignant neoplasm of ill-defined sites within the digestive system	unknown				MLH1	c.2146G>A	p.V716M
Bethesda	170	170-5	no			C80	Malignant neoplasms of ill-defined, secondary and unspecified sites	unknown				MLH1	c.2146G>A	p.V716M
Bethesda	171	171-1	yes (positive)	MLH1		C16.0	Malignant neoplasm of cardia	57,3		0%	0%	MLH1	c.2146G>A	p.V716M
Bethesda	171	171-1	yes (positive)	MLH1		C18.0	Malignant neoplasm of caecum	39,2				MLH1	c.2146G>A	p.V716M
Bethesda	171	171-1	yes (positive)	MLH1		C18.4	Malignant neoplasm of transverse colon	34,7				MLH1	c.2146G>A	p.V716M
Bethesda	171	171-1	yes (positive)	MLH1		C53.9	Malignant neoplasm of cervix uteri, unspecified	34,8				MLH1	c.2146G>A	p.V716M
Bethesda	171	171-1	yes (positive)	MLH1		C57.0	Malignant neoplasm of fallopian tube	39,8		>10%/positive	>10%/positive	MLH1	c.2146G>A	p.V716M
Bethesda	171	171-2	no			C54	Malignant neoplasm of corpus uteri	< 69				MLH1	c.2146G>A	p.V716M
Bethesda	171	171-2	no			C18.9	Colorectal carcinoma	50,5				MLH1	c.2146G>A	p.V716M
Bethesda	172	172-1	yes (positive)			C18.0	Malignant neoplasm of caecum	44,5		0%		MLH1	c.2146G>A	p.V716M
Bethesda	172	172-2	no			C85.9	Non-Hodgkin's lymphoma, unspecified type	78,5				MLH1	c.2146G>A	p.V716M
Bethesda	172	172-3	no			C53.1	Malignant neoplasm of exocervix	35,5				MLH1	c.2146G>A	p.V716M
Bethesda	173	173-1	yes (positive)	MLH1		C20	Malignant neoplasm of rectum	34,8		0%	0%	MLH1	c.2146G>A	p.V716M
Bethesda	173	173-1	yes (positive)	MLH1		C61	Malignant neoplasm of prostate	35,1				MLH1	c.2146G>A	p.V716M
Bethesda	174	174-1	yes (positive)			C20	Malignant neoplasm of rectum	48,8		0%	0%	MLH1	c.2146G>A	p.V716M
Bethesda	174	174-2	no			C50	Malignant neoplasm of breast	unknown				MLH1	c.2146G>A	p.V716M
Bethesda	174	174-3	no			C22	Malignant neoplasm of liver and intrahepatic bile ducts	unknown				MLH1	c.2146G>A	p.V716M
Bethesda	175	175-1	yes (positive)			C18.3	Malignant neoplasm of hepatic flexure	51,6		0%	0%	MLH1	c.2146G>A	p.V716M
Bethesda	175	175-1	yes (positive)			C18.9	Malignant neoplasm of colon, unspecified	52,3				MLH1	c.2146G>A	p.V716M
Bethesda	175	175-1	yes (positive)			C44.5	Malignant neoplasm of skin of trunk	50,3				MLH1	c.2146G>A	p.V716M
Bethesda	175	175-2	no			C18.9	Malignant neoplasm of colon, unspecified	unknown				MLH1	c.2146G>A	p.V716M
Amsterdam-II	176	176-1	yes (positive)			C20	Malignant neoplasm of rectum	61,7	MSS	>10%/positive		MLH1	c.2146G>A	p.V716M
Amsterdam-II	176	176-2	no			C18.9	Malignant neoplasm of colon, unspecified	53,5				MLH1	c.2146G>A	p.V716M
Amsterdam-II	176	176-2	no			C55	Malignant neoplasm of uterus, part unspecified	41,5				MLH1	c.2146G>A	p.V716M
Amsterdam-II	176	176-3	no			C18.9	Malignant neoplasm of colon, unspecified	42,5				MLH1	c.2146G>A	p.V716M
Amsterdam-II	176	176-4	no			C18.9	Malignant neoplasm of colon, unspecified	54,5				MLH1	c.2146G>A	p.V716M
Amsterdam-II	176	176-5	no			C71	Malignant neoplasm of brain	45,5				MLH1	c.2146G>A	p.V716M
Bethesda	177	177-1	yes (positive)			C18.5	Malignant neoplasm of splenic flexure	42	MSI-L	>10%/positive		MLH1	c.2146G>A	p.V716M
Bethesda	177	177-2	no			C50.9	Malignant neoplasm of breast, unspecified	unknown				MLH1	c.2146G>A	p.V716M
Bethesda	177	177-2	no			C71.9	Malignant neoplasm of brain, unspecified	62,5				MLH1	c.2146G>A	p.V716M
Bethesda	177	177-3	no			C80	Malignant neoplasms of ill-defined, secondary and unspecified sites	unknown				MLH1	c.2146G>A	p.V716M
Bethesda	177	177-4	no			C50.9	Malignant neoplasm of breast, unspecified	70,5				MLH1	c.2146G>A	p.V716M
Bethesda	177	177-5	no			C55	Malignant neoplasm of uterus, part unspecified	65,5				MLH1	c.2146G>A	p.V716M
Bethesda	178	178-1	yes (positive)			C18.2	Malignant neoplasm of ascending colon	64		>10%/positive		MLH1	c.2146G>A	p.V716M
Bethesda	178	178-2	no			C80	Malignant neoplasms of ill-defined, secondary and unspecified sites	50,5				MLH1	c.2146G>A	p.V716M
Bethesda	178	178-3	no			C80	Malignant neoplasms of ill-defined, secondary and unspecified sites	unknown				MLH1	c.2146G>A	p.V716M
Bethesda	178	178-4	no			C80	Malignant neoplasms of ill-defined, secondary and unspecified sites	unknown				MLH1	c.2146G>A	p.V716M
Bethesda	178	178-5	no			C18.9	Malignant neoplasm of colon, unspecified	56,5				MLH1	c.2146G>A	p.V716M
Bethesda	178	178-5	no			C64	Malignant neoplasm of urinary tract	67,5				MLH1	c.2146G>A	p.V716M
Bethesda	178	178-6	no			C34.9	Malignant neoplasm of bronchus or lung, unspecified	60,5				MLH1	c.2146G>A	p.V716M
Bethesda	178	178-7	no			C50.9	Malignant neoplasm of breast, unspecified	50,5				MLH1	c.2146G>A	p.V716M
Bethesda	178	178-8	no			C16.9	Malignant neoplasm of malignant neoplasm of stomach, unspecified	30,5				MLH1	c.2146G>A	p.V716M
Bethesda	179	179-1	yes (positive)			C18.3	Malignant neoplasm of hepatic flexure	21	MSS			MLH1	c.2146G>A	p.V716M
Bethesda	179	179-2	no			C18.2	Malignant neoplasm of ascending colon	47,2				MLH1	c.2146G>A	p.V716M
Bethesda	180	180-1	yes (positive)			C18.7	Malignant neoplasm of sigmoid colon	36,2	MSS	0%		MLH1	c.2146G>A	p.V716M
Bethesda	181	181-1	yes (positive)			C18.2	Malignant neoplasm of ascending colon	68,6	MSS	>10%/positive		MLH1	c.2146G>A	p.V716M
Bethesda	181	181-1	yes (positive)			C18.7	Malignant neoplasm of sigmoid colon	58,8				MLH1	c.2146G>A	p.V716M
Bethesda	181	181-2	no			C80	Malignant neoplasms of ill-defined, secondary and unspecified sites	80,5				MLH1	c.2146G>A	p.V716M
Bethesda	181	181-3	no			C18.9	Malignant neoplasm of colon, unspecified	65,5				MLH1	c.2146G>A	p.V716M
Bethesda	181	181-4	no			C16.0	Malignant neoplasm of cardia	58,5				MLH1	c.2146G>A	p.V716M
Bethesda	182	182-1	yes (positive)			C18.2	Malignant neoplasm of ascending colon	37,9	MSI-H	0%		MLH1	c.2146G>A	p.V716M
Bethesda	182	182-2	no			C18.9	Malignant neoplasm of colon, unspecified	72,5				MLH1	c.2146G>A	p.V716M
Bethesda	183	183-1	yes (positive)	MLH1		C18.9	Malignant neoplasm of colon, unspecified	41,5				MLH1	c.2146G>A	p.V716M
Bethesda	183	183-1	yes (positive)	MLH1		C54.1	Malignant neoplasm of endometrium	63,5				MLH1	c.2146G>A	p.V716M
Bethesda	183	183-2	no			C54.1	Malignant neoplasm of endometrium	39,5				MLH1	c.2146G>A	p.V716M
Bethesda	183	183-3	no			C91.9	Lymphoid leukaemia, unspecified	unknown				MLH1	c.2146G>A	p.V716M
Bethesda	183	183-4	no			C18.9	Malignant neoplasm of colon, unspecified	unknown				MLH1	c.2146G>A	p.V716M
Bethesda	183	183-5	no			C18.9	Malignant neoplasm of colon, unspecified	unknown				MLH1	c.2146G>A	p.V716M
Bethesda	183	183-6	no			C16.9	Malignant neoplasm of malignant neoplasm of stomach, unspecified	27,5				MLH1	c.2146G>A	p.V716M
Bethesda	183	183-7	no			C18.9	Malignant neoplasm of colon, unspecified	unknown				MLH1	c.2146G>A	p.V716M
Bethesda	183	183-7	no			C22.9	Malignant neoplasm of liver, unspecified	unknown				MLH1	c.2146G>A	p.V716M
Bethesda	183	183-7	no			C67.9	Malignant neoplasm of bladder, unspecified	unknown				MLH1	c.2146G>A	p.V716M
Bethesda	183	183-8	no			C80	Malignant neoplasms of ill-defined, secondary and unspecified sites	unknown				MLH1	c.2146G>A	p.V716M
Bethesda	183	183-9	no			C80	Malignant neoplasms of ill-defined, secondary and unspecified sites	unknown				MLH1	c.2146G>A	p.V716M
Bethesda	183	183-10	no			C72.9	Malignant neoplasm of central nervous system, unspecified	unknown				MLH1	c.2146G>A	p.V716M
Bethesda	183	183-11	no			C80	Malignant neoplasms of ill-defined, secondary and unspecified sites	41,5				MLH1	c.2146G>A	p.V716M
Bethesda	183	183-12	no			C80	Malignant neoplasms of ill-defined, secondary and unspecified sites	53,5				MLH1	c.2146G>A	p.V716M
Bethesda	183	183-13	no			C18.9	Malignant neoplasm of colon, unspecified	28,5				MLH1	c.2146G>A	p.V716M
Bethesda	183	183-14	no			C18.9	Malignant neoplasm of colon, unspecified	41,5				MLH1	c.2146G>A	p.V716M
Bethesda	184	184-1	yes (positive)			C18.7	Malignant neoplasm of sigmoid colon	35,3				MLH1	c.2146G>A	p.V716M
Bethesda	184	184-1	yes (positive)			C44.9	Malignant neoplasm of skin, unspecified	62,2				MLH1	c.2146G>A	p.V716M
Bethesda	184	184-2	no			C16.9	Malignant neoplasm of malignant neoplasm of stomach, unspecified	47,5				MLH1	c.2146G>A	p.V716M
Bethesda	184	184-3	no			C53.9	Malignant neoplasm of cervix uteri, unspecified	46,5				MLH1	c.2146G>A	p.V716M
Bethesda	184	184-4	no			C16.9	Malignant neoplasm of malignant neoplasm of stomach, unspecified	38,5				MLH1	c.2146G>A	p.V716M
Bethesda	184	184-5	no			C44.9	Malignant neoplasm of skin, unspecified	17,5				MLH1	c.2146G>A	p.V716M
Bethesda	32	32-1	yes (positive)		p.S95A	C18.4	Malignant neoplasm of transverse colon	41,9		0%	0%	MLH1	c.2146G>A	p.V716M						0.18	0.62	2.78
Bethesda	32	32-2	no			C50	Malignant neoplasm of breast	< 51				MLH1	c.2146G>A	p.V716M
Bethesda	32	32-3	no			C16	Malignant neoplasm of stomach	59 <= x < 82,4				MLH1	c.2146G>A	p.V716M
Bethesda	32	32-4	no			C50	Malignant neoplasm of breast	26,5				MLH1	c.2146G>A	p.V716M
Bethesda	32	32-4	no			C56	Malignant neoplasm of ovary	33 <= x < 51,4				MLH1	c.2146G>A	p.V716M
Amsterdam-II	121	121-1	yes (positive)		p.P640S	C18.7	Malignant neoplasm of sigmoid colon	63,3				MLH1	c.2146G>A	p.V716M						0.18	0.62	2.78
Amsterdam-II	121	121-1	yes (positive)			C43	Melanoma and other malignant neoplasms of skin	66,3				MLH1	c.2146G>A	p.V716M
Amsterdam-II	121	121-1	yes (positive)			C56	Malignant neoplasm of ovary	47				MLH1	c.2146G>A	p.V716M
Amsterdam-II	121	121-2	no			C18.9	Malignant neoplasm of colon, unspecified	43,5				MLH1	c.2146G>A	p.V716M
Amsterdam-II	121	121-3	no			C18.9	Malignant neoplasm of colon, unspecified	62,5				MLH1	c.2146G>A	p.V716M
Amsterdam-II	121	121-4	no			C18.9	Malignant neoplasm of colon, unspecified	57,5				MLH1	c.2146G>A	p.V716M
Amsterdam-II	121	121-4	no			C18.9	Malignant neoplasm of colon, unspecified	30,5				MLH1	c.2146G>A	p.V716M
Amsterdam-II	121	121-4	no			C18.9	Malignant neoplasm of colon, unspecified	40,5				MLH1	c.2146G>A	p.V716M
Amsterdam-II	121	121-5	no			C18.9	Malignant neoplasm of colon, unspecified	unknown				MLH1	c.2146G>A	p.V716M
Bethesda	47	47-1	yes (positive)		p.E227D	C18.2	Malignant neoplasm of ascending colon	42,7	MSI-H	>10%/positive		MLH1	c.2146G>A	p.V716M						0.18	0.62	2.78
Bethesda	47	47-2	no			C18.2	Malignant neoplasm of ascending colon	67,5	MSS	>10%/positive		MLH1	c.2146G>A	p.V716M
Amsterdam-II	92	92-1	yes (positive)		p.P581L	C18.2	Malignant neoplasm of ascending colon	47				MLH1	c.2146G>A	p.V716M						0.18	0.62	2.78
Amsterdam-II	92	92-1	yes (positive)			C18.9	Malignant neoplasm of colon, unspecified	60				MLH1	c.2146G>A	p.V716M
Amsterdam-II	92	92-1	yes (positive)			C56	Malignant neoplasm of ovary	50				MLH1	c.2146G>A	p.V716M
Amsterdam-II	92	92-2	no			C18.9	Malignant neoplasm of colon, unspecified	60,5				MLH1	c.2146G>A	p.V716M
Amsterdam-II	92	92-3	no			C18.9	Malignant neoplasm of colon, unspecified	43,5				MLH1	c.2146G>A	p.V716M
Amsterdam-II	92	92-4	no			C18.9	Malignant neoplasm of colon, unspecified	unknown				MLH1	c.2146G>A	p.V716M
Amsterdam-II	92	92-5	no			C18.9	Malignant neoplasm of colon, unspecified	50,5				MLH1	c.2146G>A	p.V716M
Bethesda	185	185-1	yes (positive)	MSH2		D12.6	Adenoma	unknown				MLH1	c.2152C>T	p.H718Y								3.45	[22]		[22]		[6]
Bethesda	185	185-2	no			C55	Malignant neoplasm of uterus, part unspecified	unknown				MLH1	c.2152C>T	p.H718Y
Bethesda	185	185-3	no			C16	Malignant neoplasm of stomach	unknown				MLH1	c.2152C>T	p.H718Y
Bethesda	185	185-4	no			C61	Malignant neoplasm of prostate	unknown				MLH1	c.2152C>T	p.H718Y
Bethesda	186	186-1	yes (positive)			C18.9	Malignant neoplasm of colon, unspecified	52,1	MSI-H	>10%/positive	>10%/positive	MLH1	c.2159T>C	p.V720A								6.1
Bethesda	186	186-2	no			C18.9	Malignant neoplasm of colon, unspecified	65,5				MLH1	c.2159T>C	p.V720A
Bethesda	186	186-3	no			C18.9	Malignant neoplasm of colon, unspecified	unknown				MLH1	c.2159T>C	p.V720A
Bethesda	186	186-4	no			C18.9	Malignant neoplasm of colon, unspecified	unknown				MLH1	c.2159T>C	p.V720A
Bethesda	186	186-5	no			C18.9	Malignant neoplasm of colon, unspecified	55,5				MLH1	c.2159T>C	p.V720A
Bethesda	187	187-1	yes (positive)			C18.6	Malignant neoplasm of descending colon	56,8	MSI-H	0%		MLH1	c.2159T>C	p.V720A
Bethesda	187	187-2	no			C18.9	Malignant neoplasm of colon, unspecified	58,5				MLH1	c.2159T>C	p.V720A
Bethesda	187	187-3	no			C18.9	Malignant neoplasm of colon, unspecified	54,5				MLH1	c.2159T>C	p.V720A
Bethesda	187	187-3	no			C34.9	Malignant neoplasm of bronchus or lung, unspecified	65,5				MLH1	c.2159T>C	p.V720A
Amsterdam-II	168	168-1	yes (positive)	MLH1	p.Q701H	C18.6	Malignant neoplasm of descending colon	51,4	MSI-H	0%		MLH1	c.2210A>T	p.D737V								not available
Amsterdam-II	168	168-2	yes (positive)	MLH1		C16	Malignant neoplasm of stomach	< 55	MSI-H	0%		MLH1	c.2210A>T	p.D737V
Amsterdam-II	168	168-2	yes (positive)	MLH1		C18.2	Malignant neoplasm of ascending colon	23,9				MLH1	c.2210A>T	p.D737V
Amsterdam-II	168	168-2	yes (positive)	MLH1		C18.4	Malignant neoplasm of transverse colon	54,1				MLH1	c.2210A>T	p.D737V
Amsterdam-II	168	168-3	no			C18.9	Malignant neoplasm of colon, unspecified	51,5				MLH1	c.2210A>T	p.D737V
Amsterdam-II	168	168-4	no			C18.9	Malignant neoplasm of colon, unspecified	unknown				MLH1	c.2210A>T	p.D737V
Amsterdam-II	168	168-5	no			C18.9	Malignant neoplasm of colon, unspecified	unknown				MLH1	c.2210A>T	p.D737V
Amsterdam-II	188	188-1	yes (positive)			C18.9	Malignant neoplasm of colon, unspecified	44	MSI-H			MLH1	c.2265G>T	p.R755S								21.57		[22]	[22]
Amsterdam-II	188	188-1	yes (positive)			C18.2	Malignant neoplasm of ascending colon	32				MLH1	c.2265G>T	p.R755S
Amsterdam-II	188	188-1	yes (positive)			C43	Melanoma and other malignant neoplasms of skin	39,2				MLH1	c.2265G>T	p.R755S
Amsterdam-II	188	188-2	no			C18.9	Malignant neoplasm of colon, unspecified	67,5				MLH1	c.2265G>T	p.R755S
Amsterdam-II	188	188-3	no			C18.9	Malignant neoplasm of colon, unspecified	56,5				MLH1	c.2265G>T	p.R755S
Amsterdam-II	188	188-4	no			C18.9	Malignant neoplasm of colon, unspecified	unknown				MLH1	c.2265G>T	p.R755S
Amsterdam-II	188	188-5	no			C18.9	Malignant neoplasm of colon, unspecified	72,5				MLH1	c.2265G>T	p.R755S
Amsterdam-II	188	188-6	no			C18.9	Malignant neoplasm of colon, unspecified	< 56,1				MLH1	c.2265G>T	p.R755S
Amsterdam-II	188	188-7	no			C18.9	Malignant neoplasm of colon, unspecified	unknown				MLH1	c.2265G>T	p.R755S

## Sheet: explanation
Explanation for the Table:
Each Family has an individual ID and each person from the family is numbered consecutively. On the left of the Table, each family member is listed individually with the tumor/adenoma identified, the tumor characteristics and whether this person was tested and is positive or negative for the missense variant identified in the family. When additional missense variants or pathogenic mutations were f…
On the right half of the Table, the individual missense mutation is listed once with the functional data. The results of our functional assays are given in % versus wild type. Data from the literature are sorted according to their functional results in positive or negative and the references are given for the respective results. Reference numbers are according to the numbering from the main paper…
References in the Table:
6.	Kondo E, Suzuki H, Horii A, Fukushige S (2003) A yeast two-hybrid assay provides a simple way to evaluate the vast majority of hMLH1 germ-line mutations. Cancer Res 63(12): 3302-3308
16.	Shimodaira H, Filosi N, Shibata H, Suzuki T, Radice P, Kanamaru R (1998) Functional analysis of human MLH1 mutations in Saccharomyces cerevisiae. Nat Genet (19): 384-389
17.	Trojan J, Zeusem S, Randolph A, et al. (2002) Functional Analysis of hMLH1 Variants and HNPCC-Related Mutations Using a Human Expression System. Gastroenterology (122): 211-219
18.	Raevaara TE, Korhonen MK, Lohi H, et al. (2005) Functional Significance and Clinical Phenotype of Nontruncating Mismatch Repair Variants of MLH1. Gastroenterology (129): 537-549
21.	Kosinski J, Hinrichsen I, Bujnicki JM, Friedhoff P, Plotz G (2010) Identification of Lynch syndrome mutations in the MLH1-PMS2 interface that disturb dimerization and mismatch repair. Hum Mutat 31(8): 975-982
22.	Takahashi M, Shimodaira H, Andreutti-Zaugg C, Iggo R (2007) Functional Analysis of Human MLH1 Variants Using Yeast and In vitro Mismatch Repair Assays. Cancer Res (67): 4595-4604
Splicing references:
35.	Auclair J, Busine MP, Navarro C, et al. (2006) Systematic mRNA analysis for the effect of MLH1 and MSH2 missense and silent mutations on aberrant splicing. Hum Mutat 27(2): 145-154
36.	Kurzawski G, Suchy J, Kladny J, et al. (2002) Germline MSH2 and MLH1 mutational spectrum in HNPCC families from Poland and the Baltic States. J Med Genet 39(10): E65
37.	Mangold E, Pagenstecher C, Friedl W, et al. (2005) Spectrum and frequencies of mutations in MSH2 and MLH1 identified in 1,721 German families suspected of hereditary nonpolyposis colorectal cancer. Int J Cancer 116(5): 692-702
38.	Pagenstecher C, Wehner M, Friedl W, et al. (2006) Aberrant splicing in MLH1 and MSH2 due to exonic and intronic variants. Hum Genet 119(1-2): 9-22
39.	Tournier I, Vezain M, Martins A, et al. (2008) A large fraction of unclassified variants of the mismatch repair genes MLH1 and MSH2 is associated with splicing defects. Hum Mutat 29(12): 1412-1424
40.	Betz B, Theiss S, Aktas M, et al. (2009) Comparative in silico analyses and experimental validation of novel splice site and missense mutations in the genes MLH1 and MSH2. J Cancer Res Clin Oncol
